# Supplementary material for: Anion–π interactions influence pKa values
Source: publisher site journal article supplement (doi:10.3762/bjoc.7.42), 2011-03-17

## Supporting Information

for

### **Anion– $\pi$ interactions influence $pK_a$ values**

Christopher J. Cadman and Anna K. Croft\*

Address: School of Chemistry, University of Wales Bangor, Bangor, Gwynedd, LL57 2UW, United Kingdom. Fax: +44 1248 370 528. Tel: +44 1248 382 375.

Email: Anna K. Croft - [a.k.croft@bangor.ac.uk](mailto:a.k.croft@bangor.ac.uk)

\*Corresponding author

### **Original spectral data for compounds 1–5**

Compound 1: 8-phenyl-1-naphthol

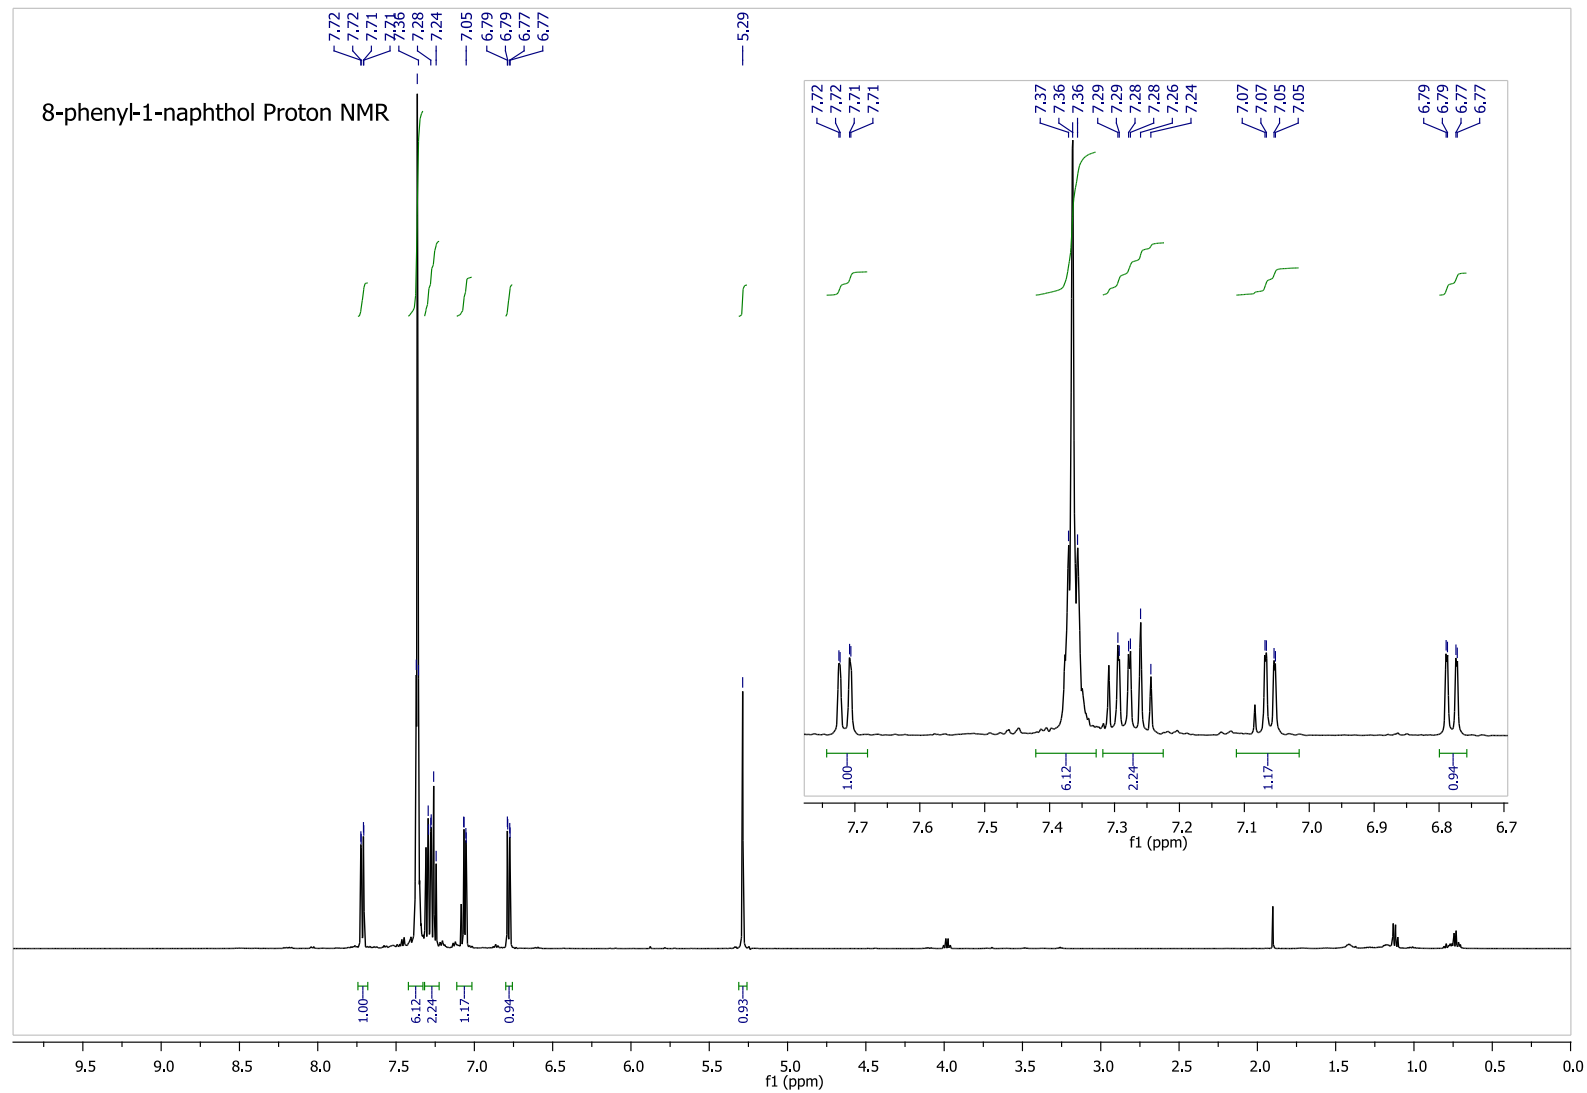

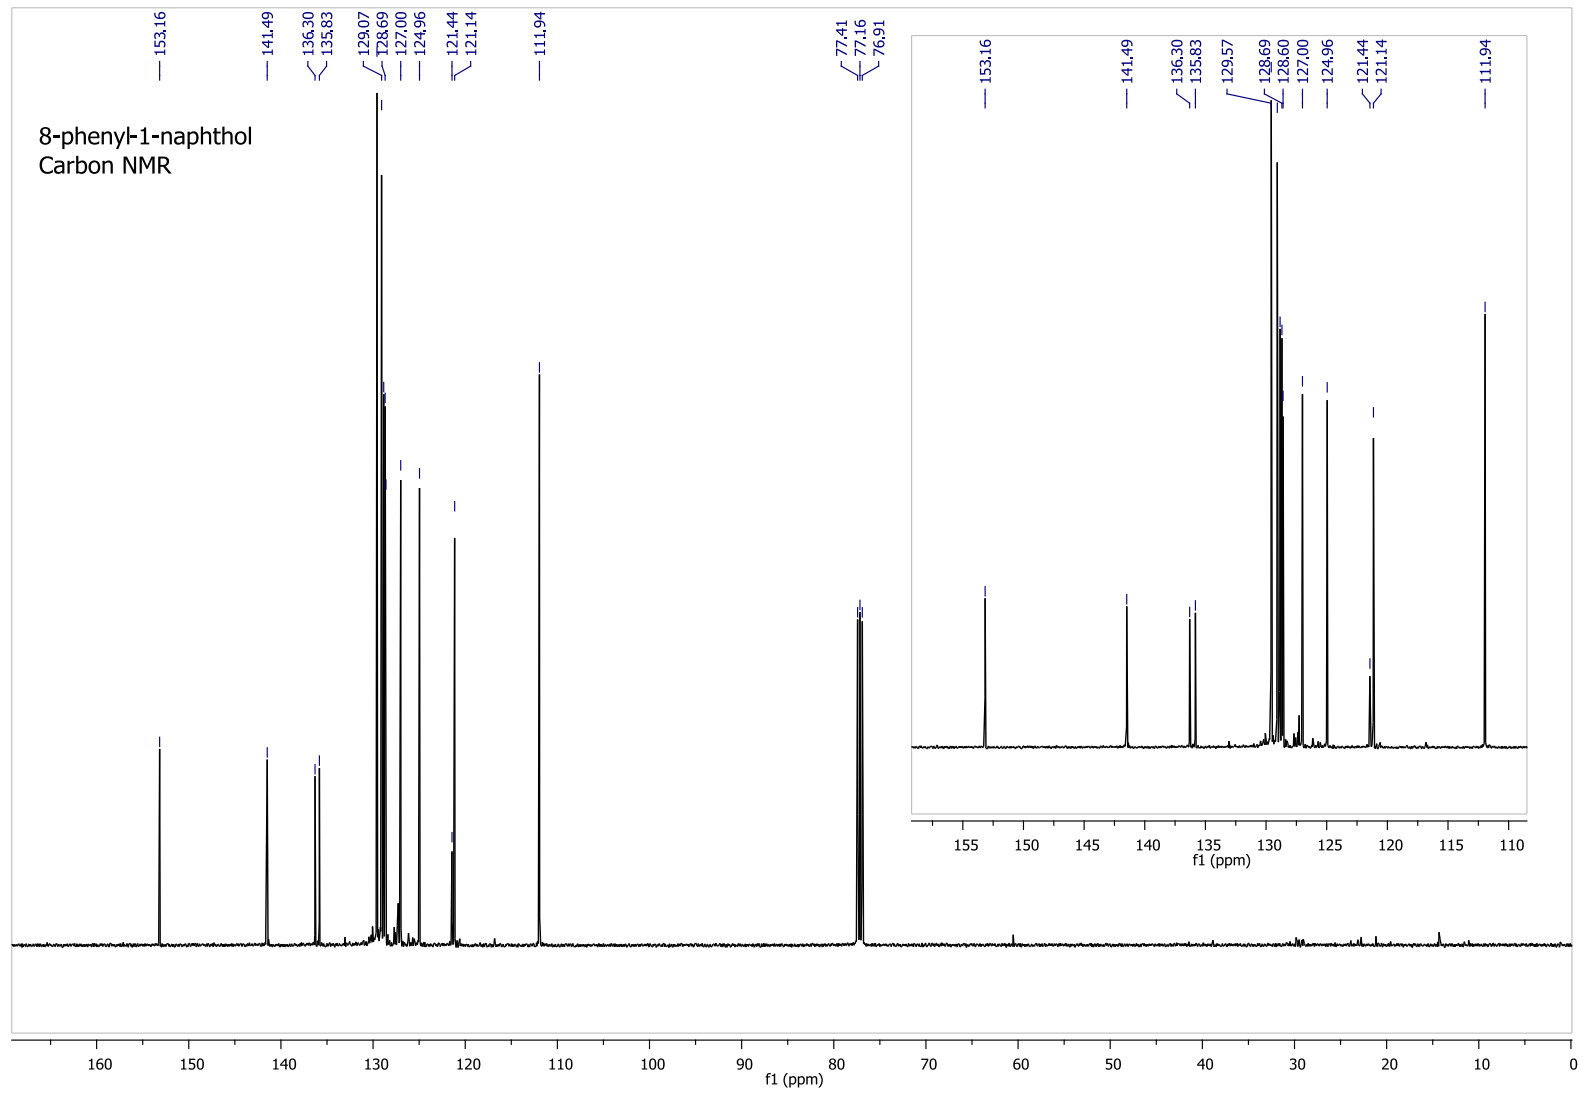

# Compound 2: 8-(4-nitrophenyl)-1-naphthol

Research group AKC  
Project name 500110519  
CA0011

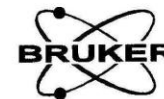

\*\*\* Current Data Parameters \*\*\*

NAME : oc2808  
EXPNO : 80  
PROCNO : 1

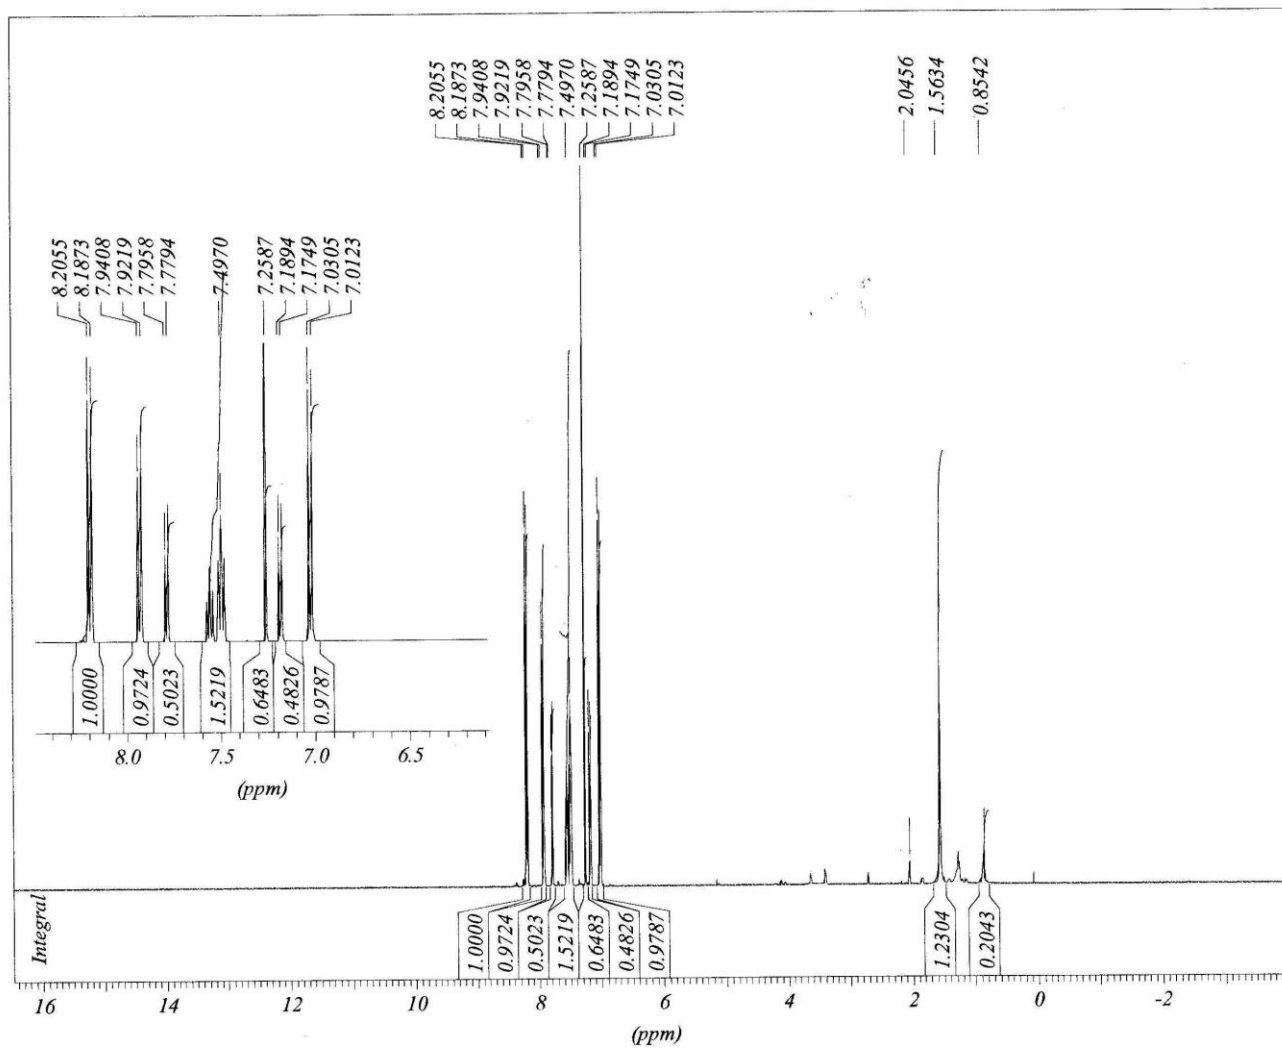

8-(4-nitrophenyl)-1-naphthol Proton NMR

Research group AKC  
Project name 500110  
CA0011

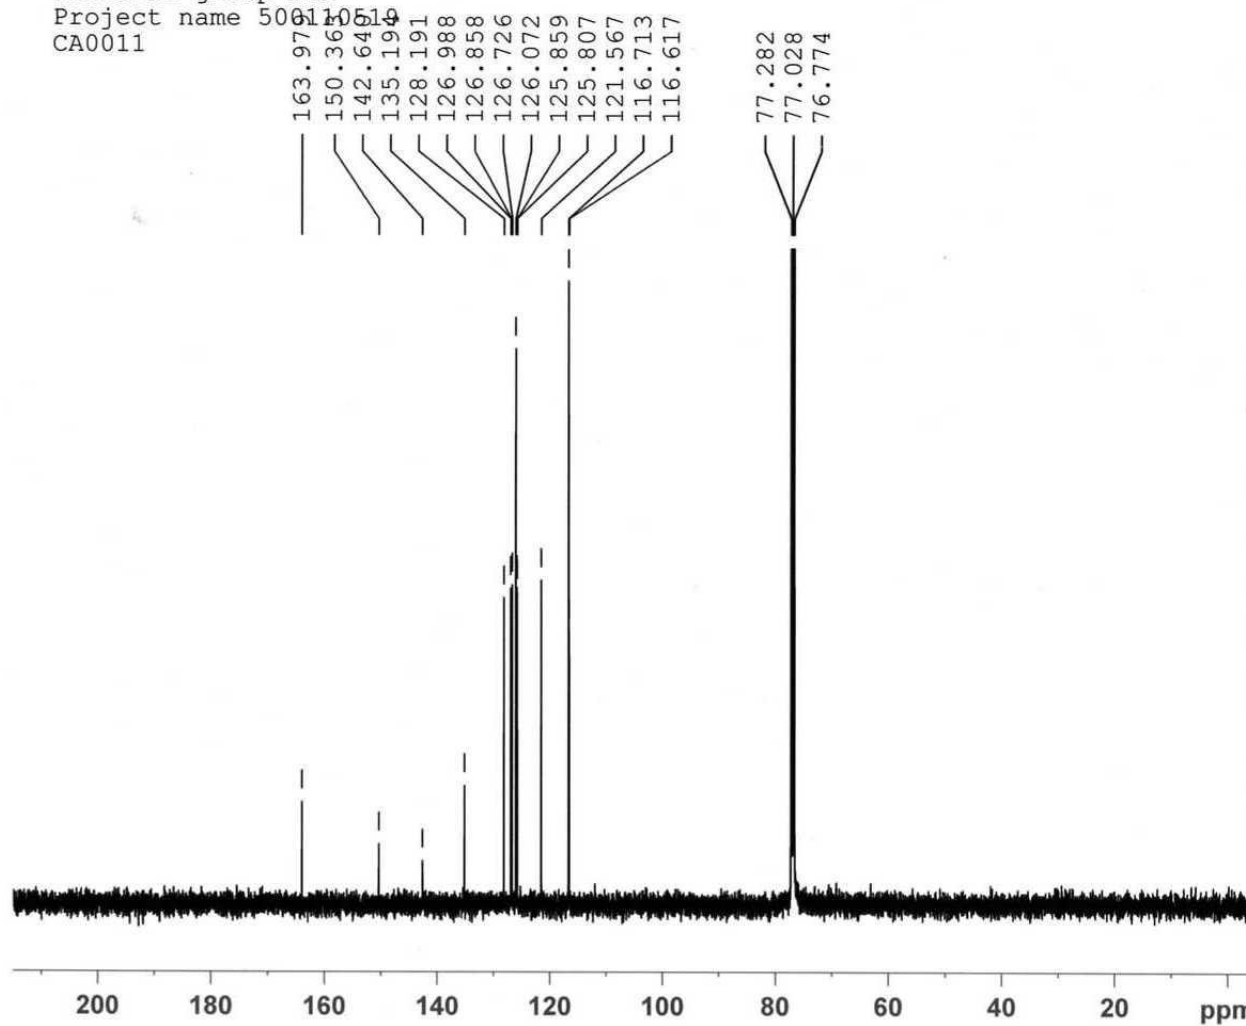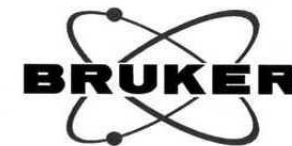

Current Data Parameters  
NAME oc2808  
EXPNO 81  
PROCNO 1

F2 - Acquisition Parameters  
Date\_ 20081029  
Time\_ 7.42  
INSTRUM spect  
PROBHD 5 mm BBO BB-1H  
PULPROG zgpg30  
TD 65536  
SOLVENT CDCl3  
NS 1024  
DS 4  
SWH 30030.029 Hz  
FIDRES 0.458222 Hz  
AQ 1.0912410 sec  
RG 912.3  
DW 16.650 usec  
DE 6.00 usec  
TE 296.6 K  
D1 2.00000000 sec  
d11 0.03000000 sec  
DELTA 1.89999998 sec  
MCREST 0.00000000 sec  
MCWRK 0.01500000 sec

===== CHANNEL f1 =====  
NUC1 13C  
P1 11.50 usec  
PL1 1.00 dB  
SFO1 125.7703643 MHz

===== CHANNEL f2 =====  
CPDPRG2 waltz16  
NUC2 1H  
PCPD2 80.00 usec  
PL2 -2.00 dB  
PL12 16.00 dB  
PL13 17.00 dB  
SFO2 500.1320005 MHz

F2 - Processing parameters  
SI 32768  
SF 125.7577890 MHz  
WDW EM  
SSB 0  
LB 1.00 Hz  
GB 0  
PC 1.40

8-(4-nitrophenyl)-1-naphthol Carbon NMR

Analyst Administrator  
Date 03 November 2008 12:43

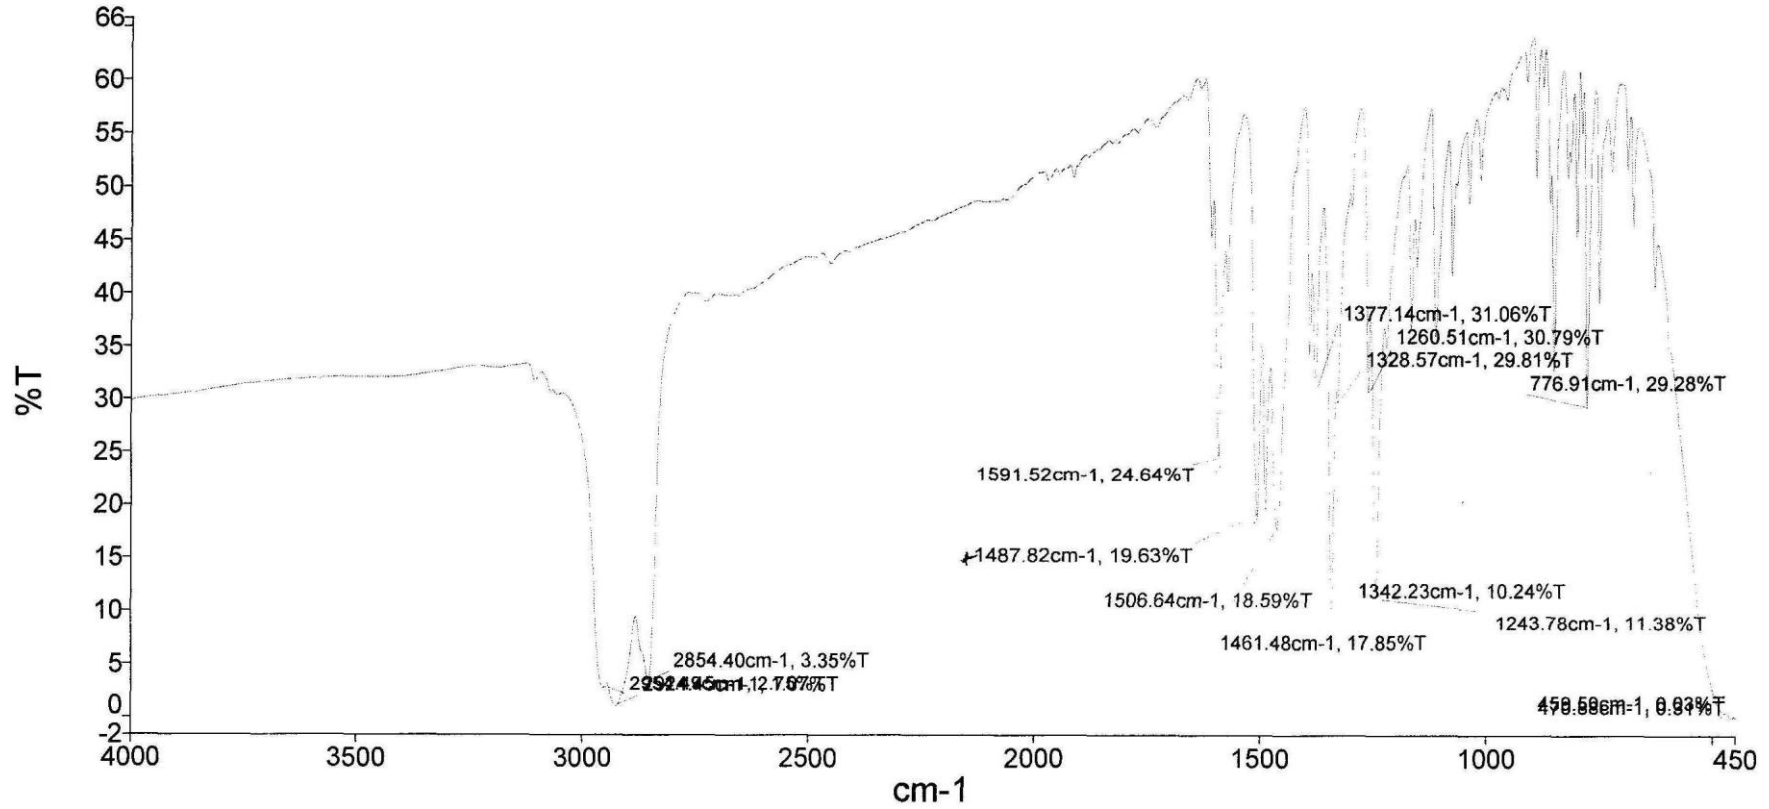

Administrator 62 Sample 062 By Administrator date Monday, November 03 2008

cad02 #1299 RT: 24.65 AV: 1 NL: 2.58E5  
T: {0,0} + c EI det=350.00 Full ms [ 50.00-650.00]

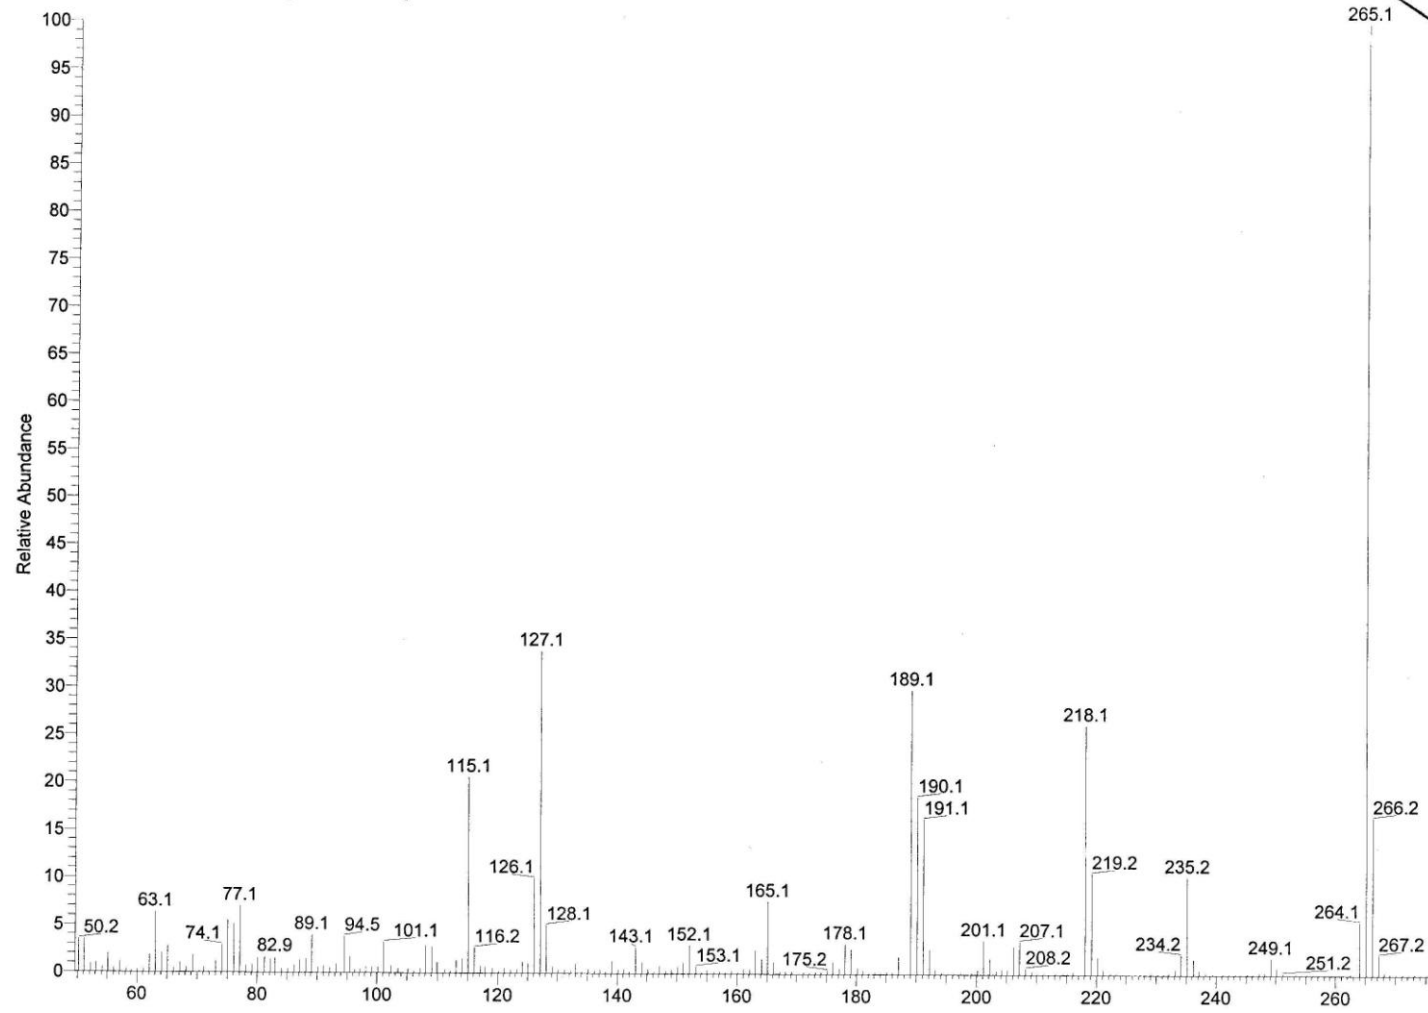

**Compound 3: 8-(4-chlorophenyl)-1-naphthol**

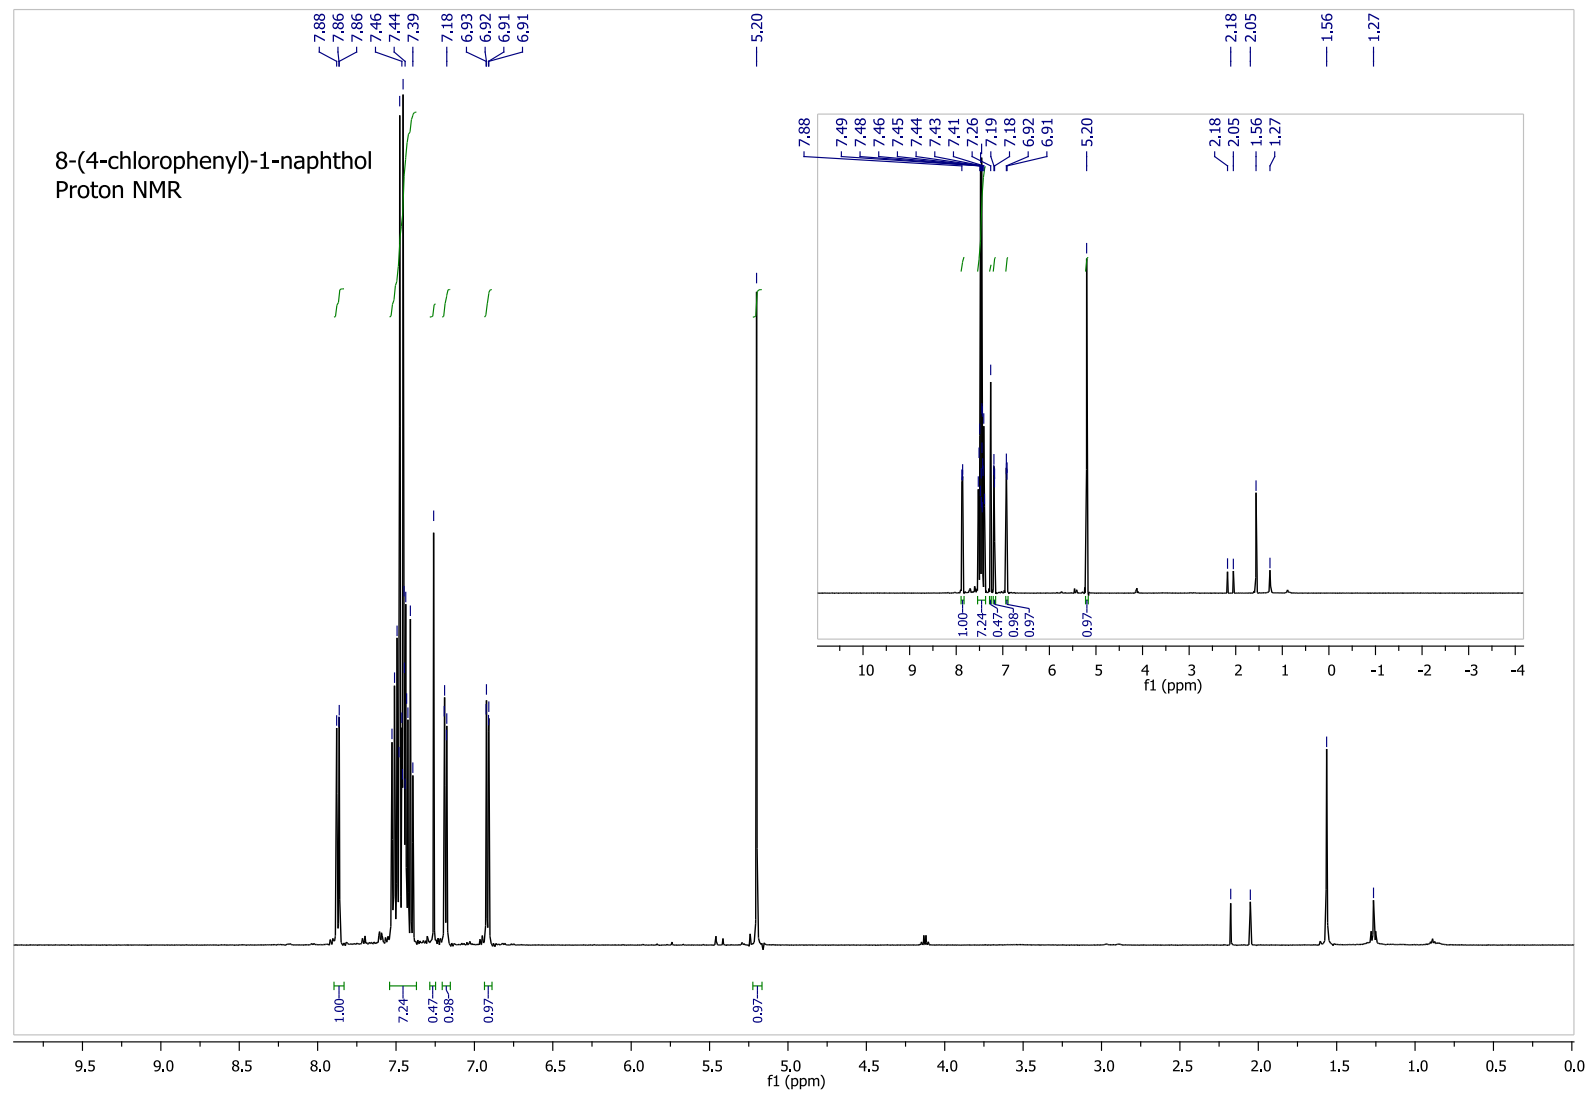



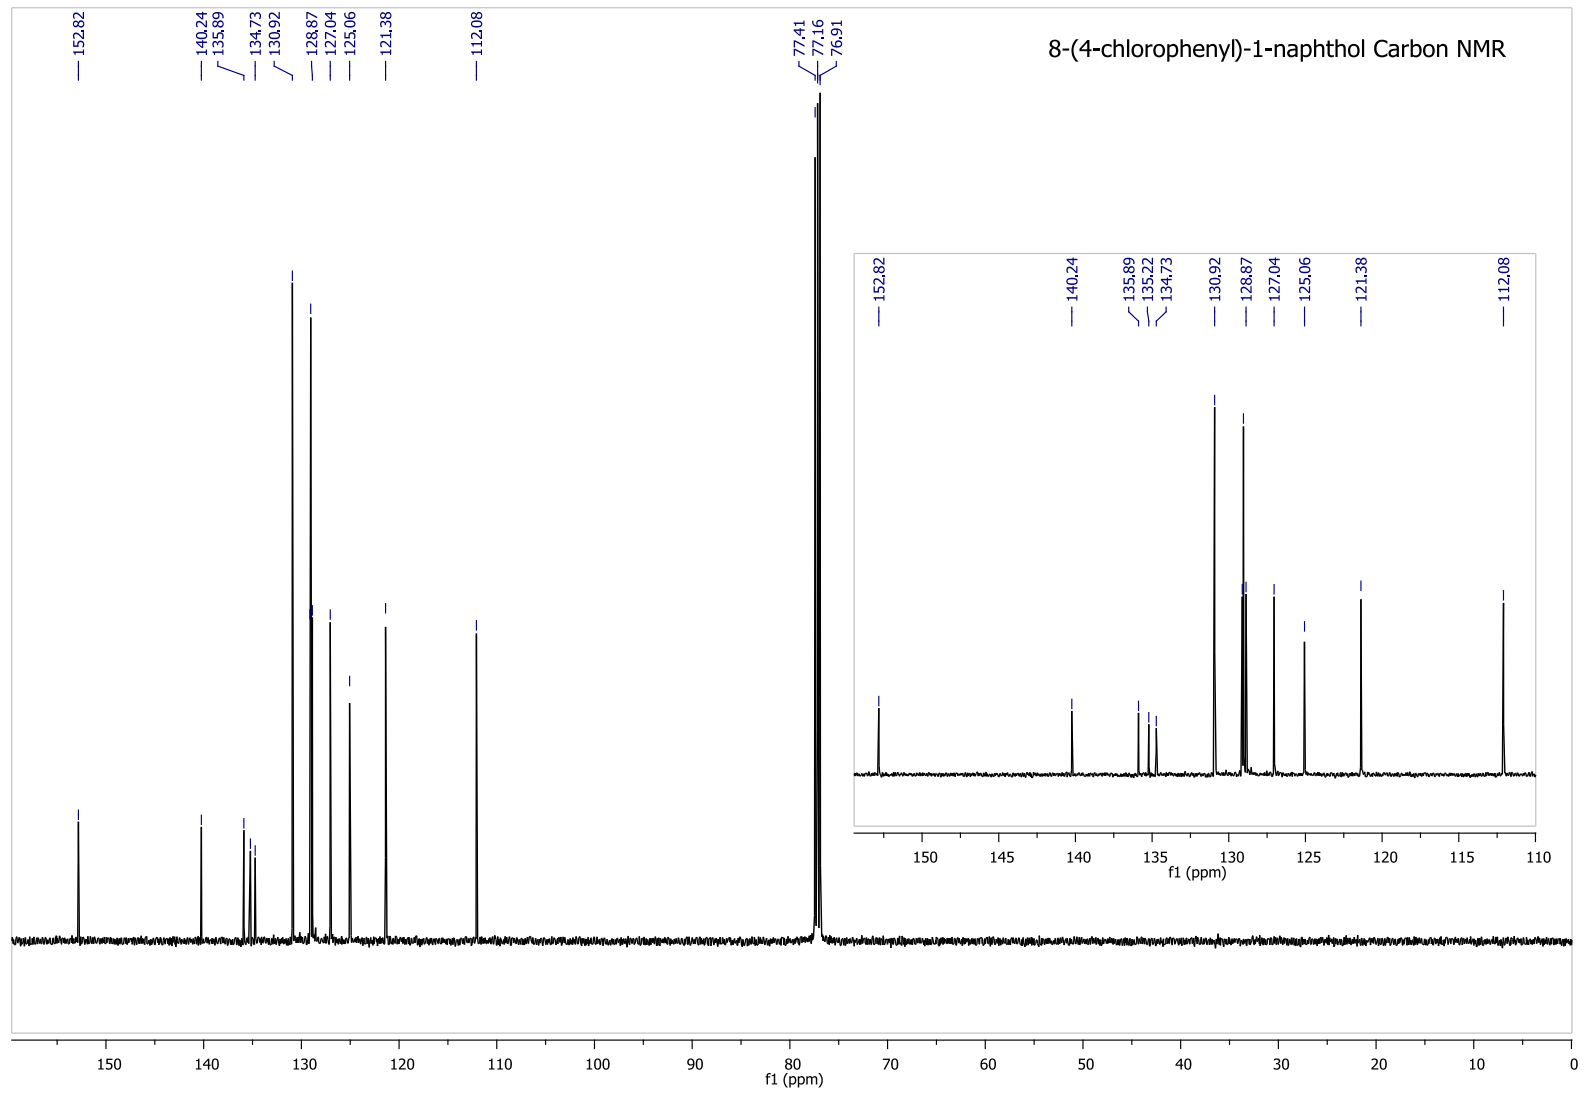

Analyst Administrator  
Date 26 January 2009 14:42

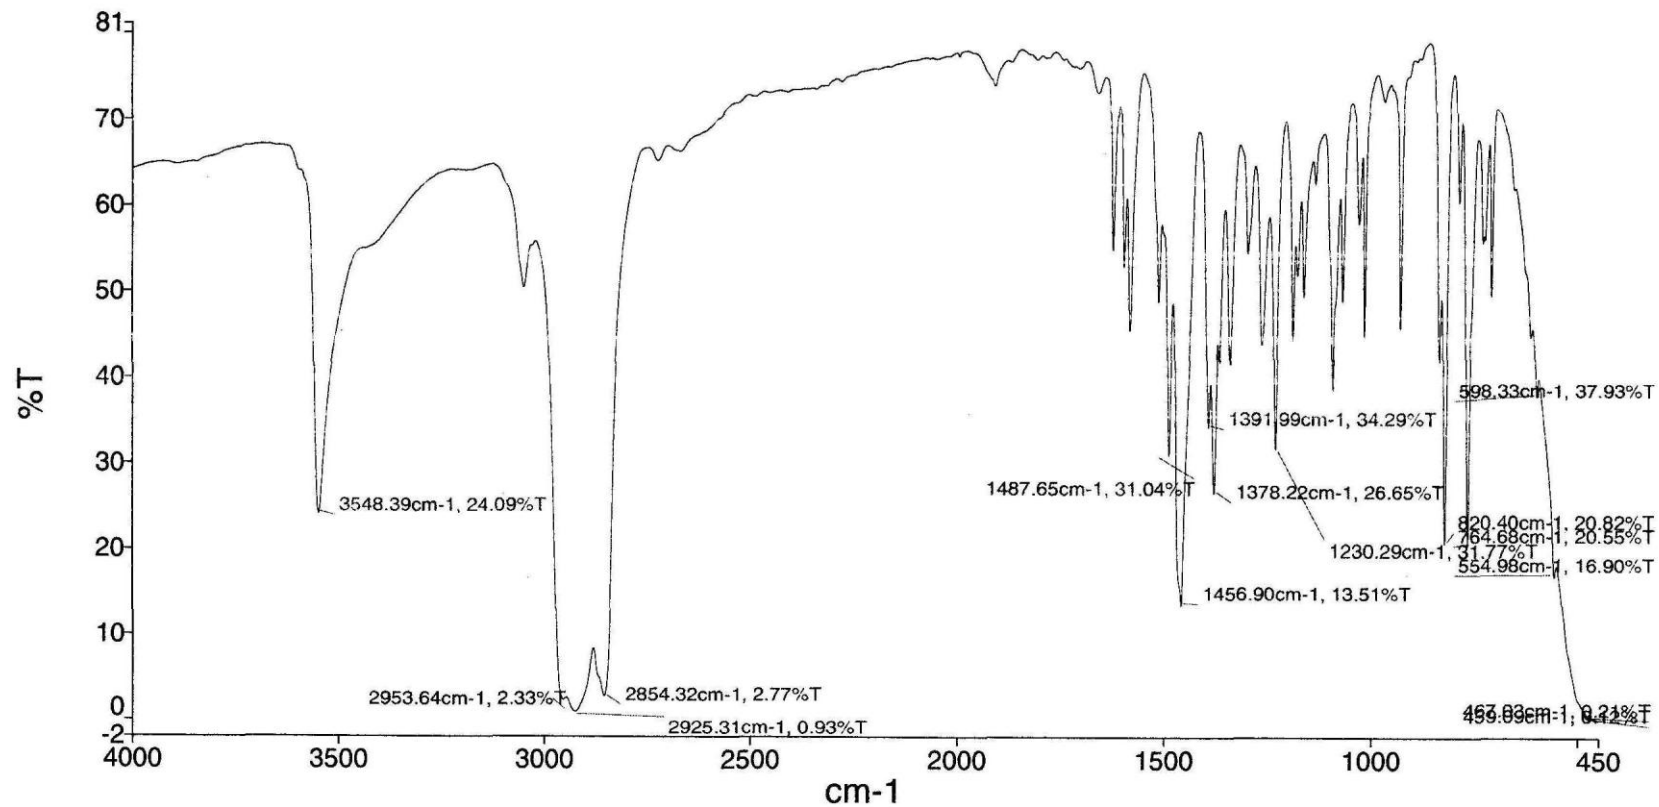

Administrator 10 Sample 010 By Administrator date Monday, January 26 2009

ad01\_090206125747 #1204 RT: 23.07 AV: 1 SB: 7 22.79-22.89 NL: 3.01E6  
: {0,0} + c EI det=350.00 Full ms [ 50.00-650.00]

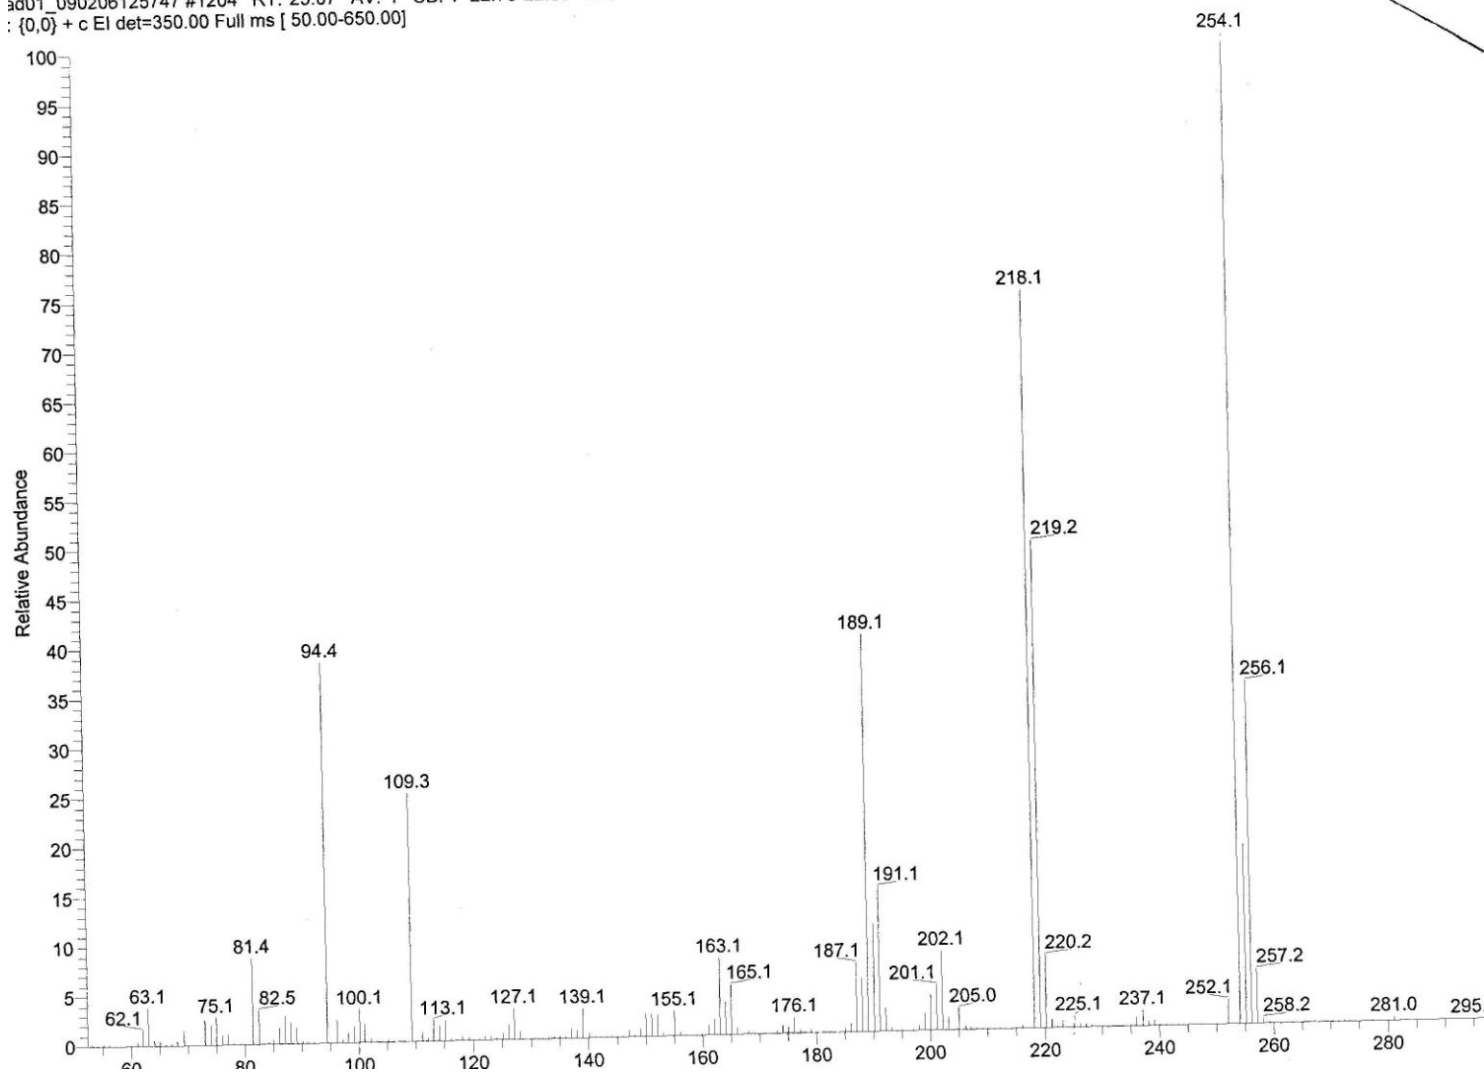

**Compound 4: 8-(4-methylphenyl)-1-naphthol**

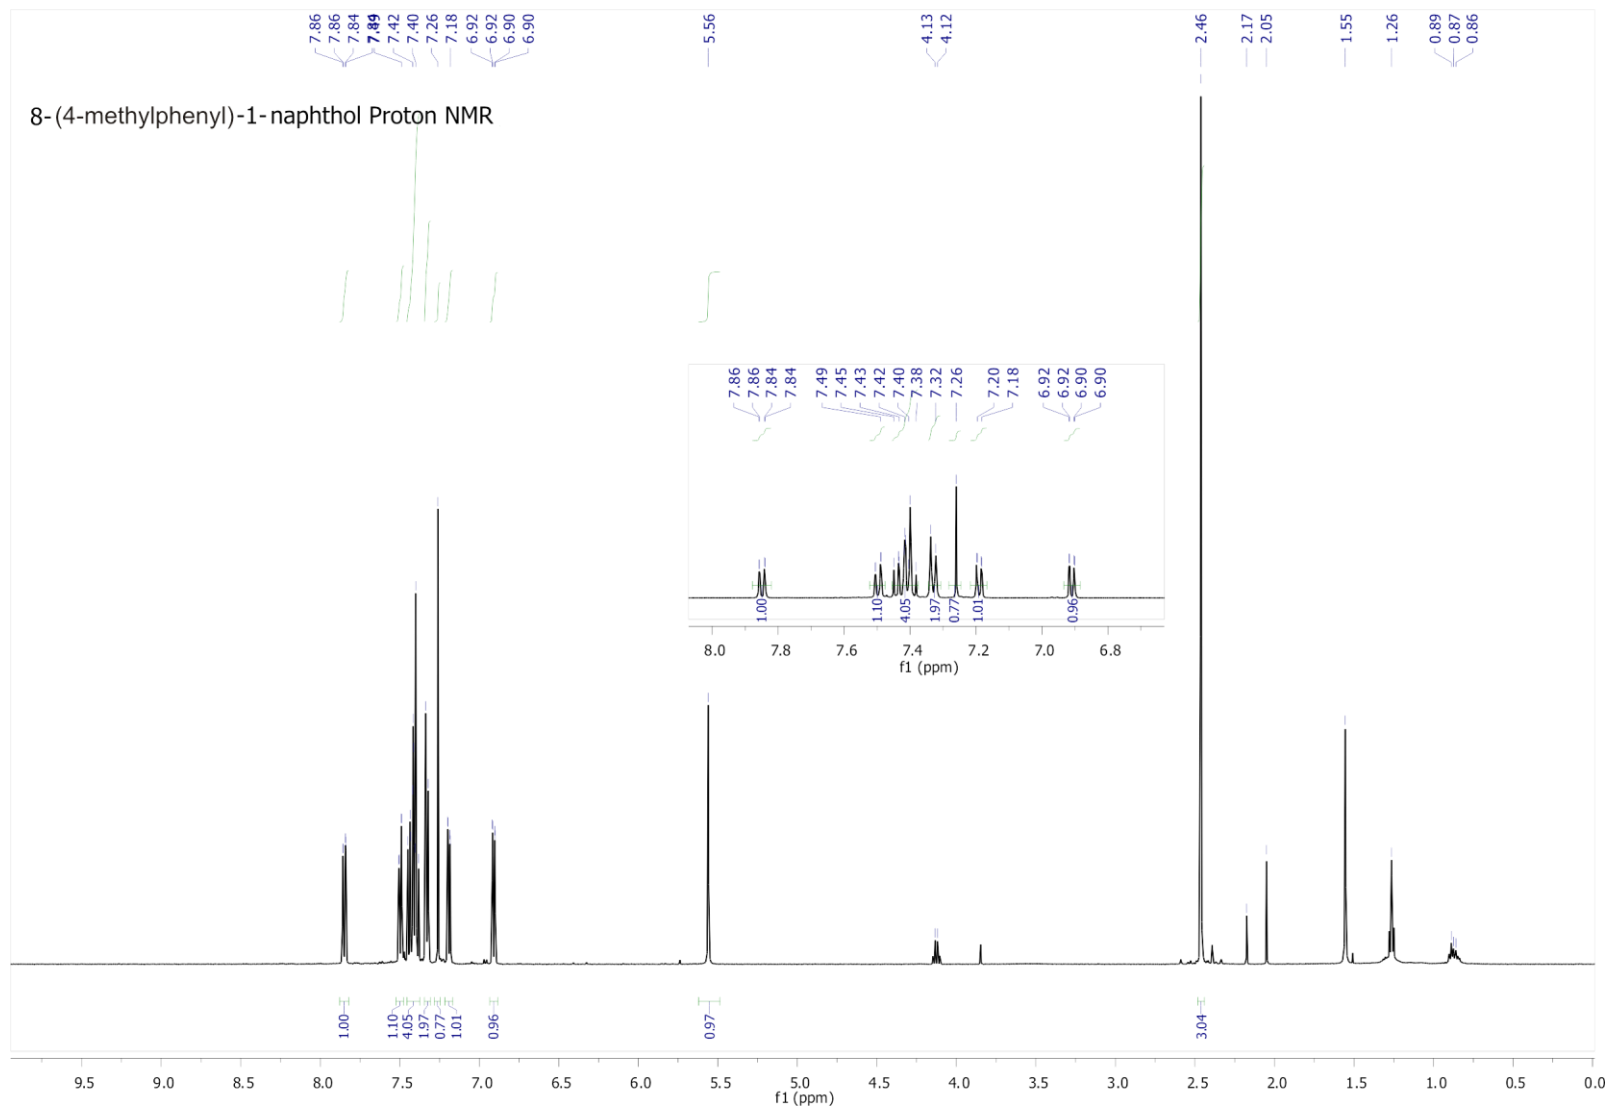

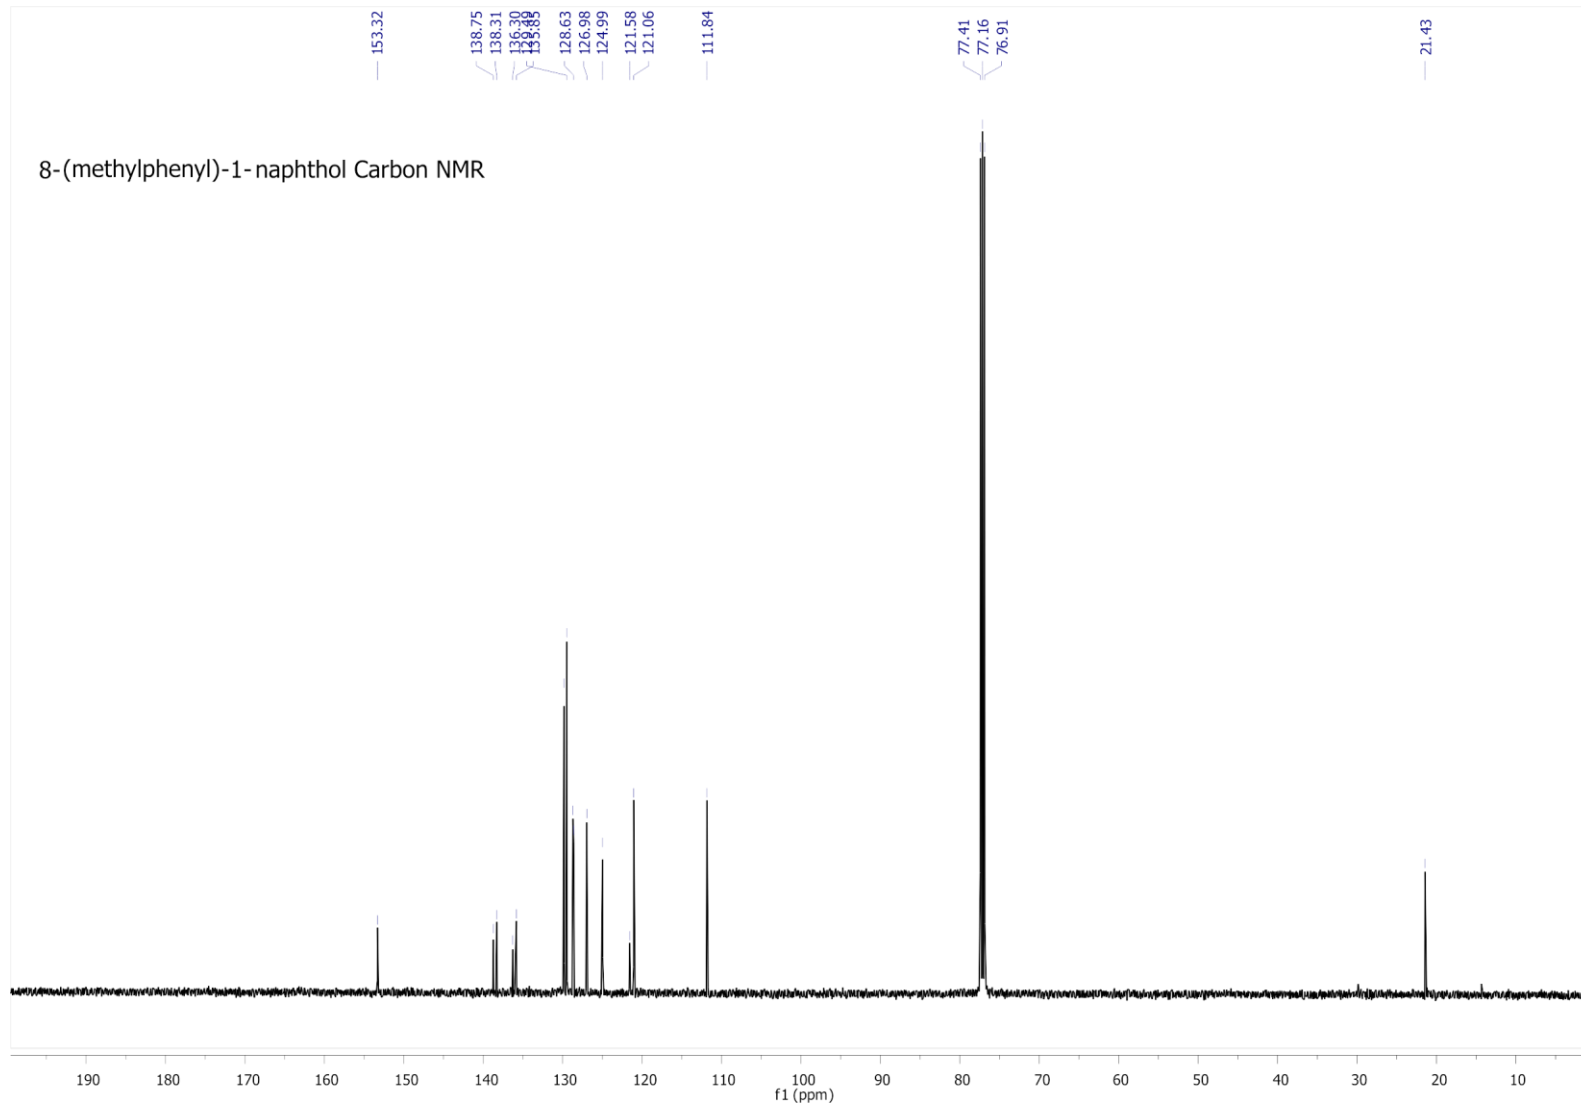

Analyst  
Date

Administrator  
26 January 2009 14:54

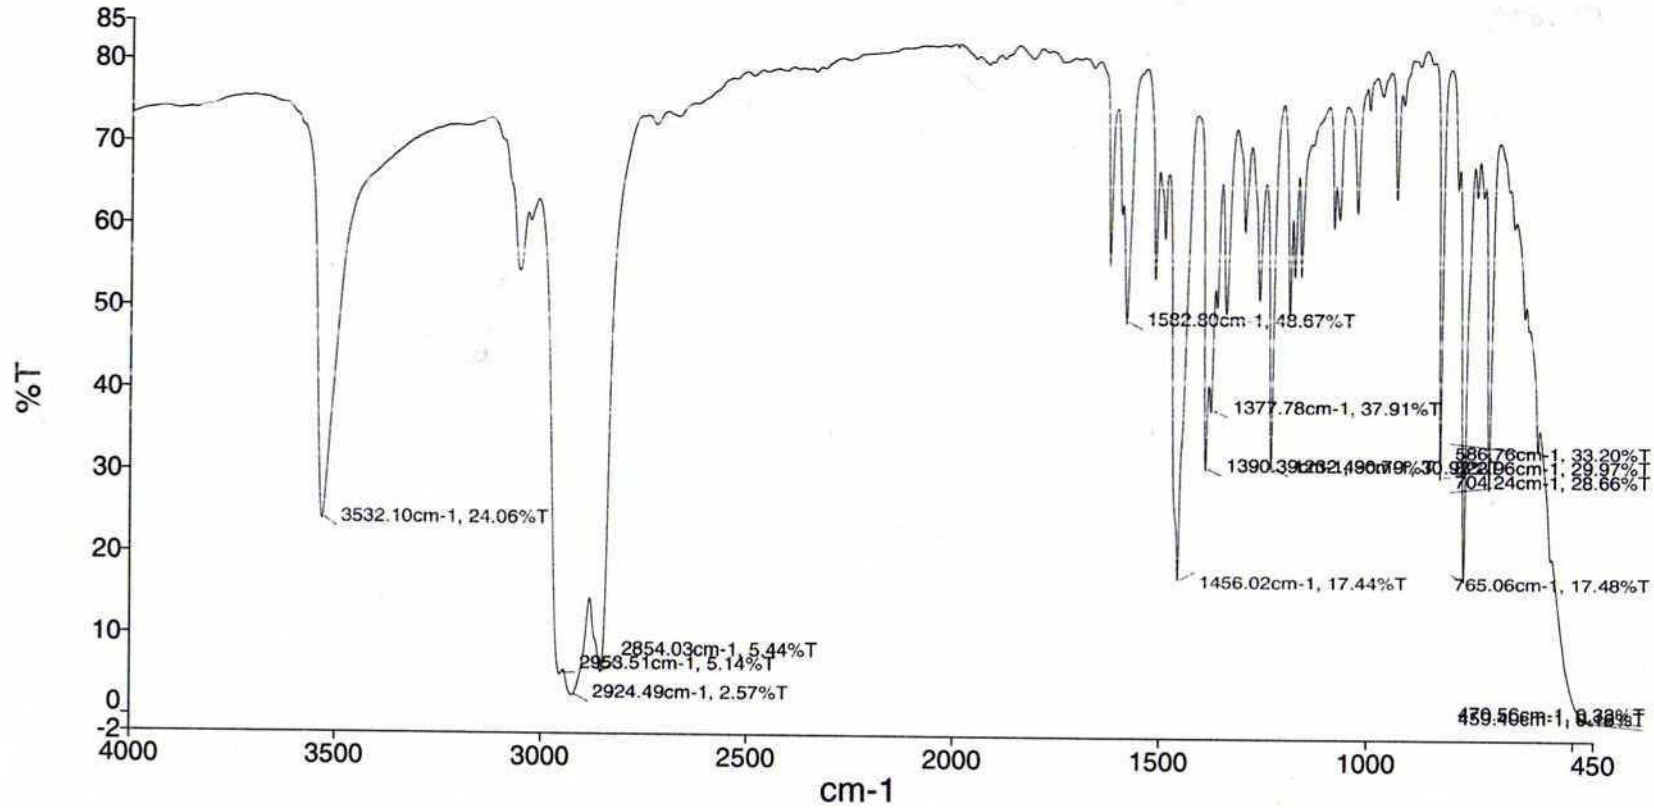

Administrator 12 Sample 012 By Administrator date Monday, January 26 2009

cad04 #1140 RT: 22.00 AV: 1 NL: 1.69E6  
T: {0,0} + c EI det=350.00 Full ms [ 50.00-650.00]

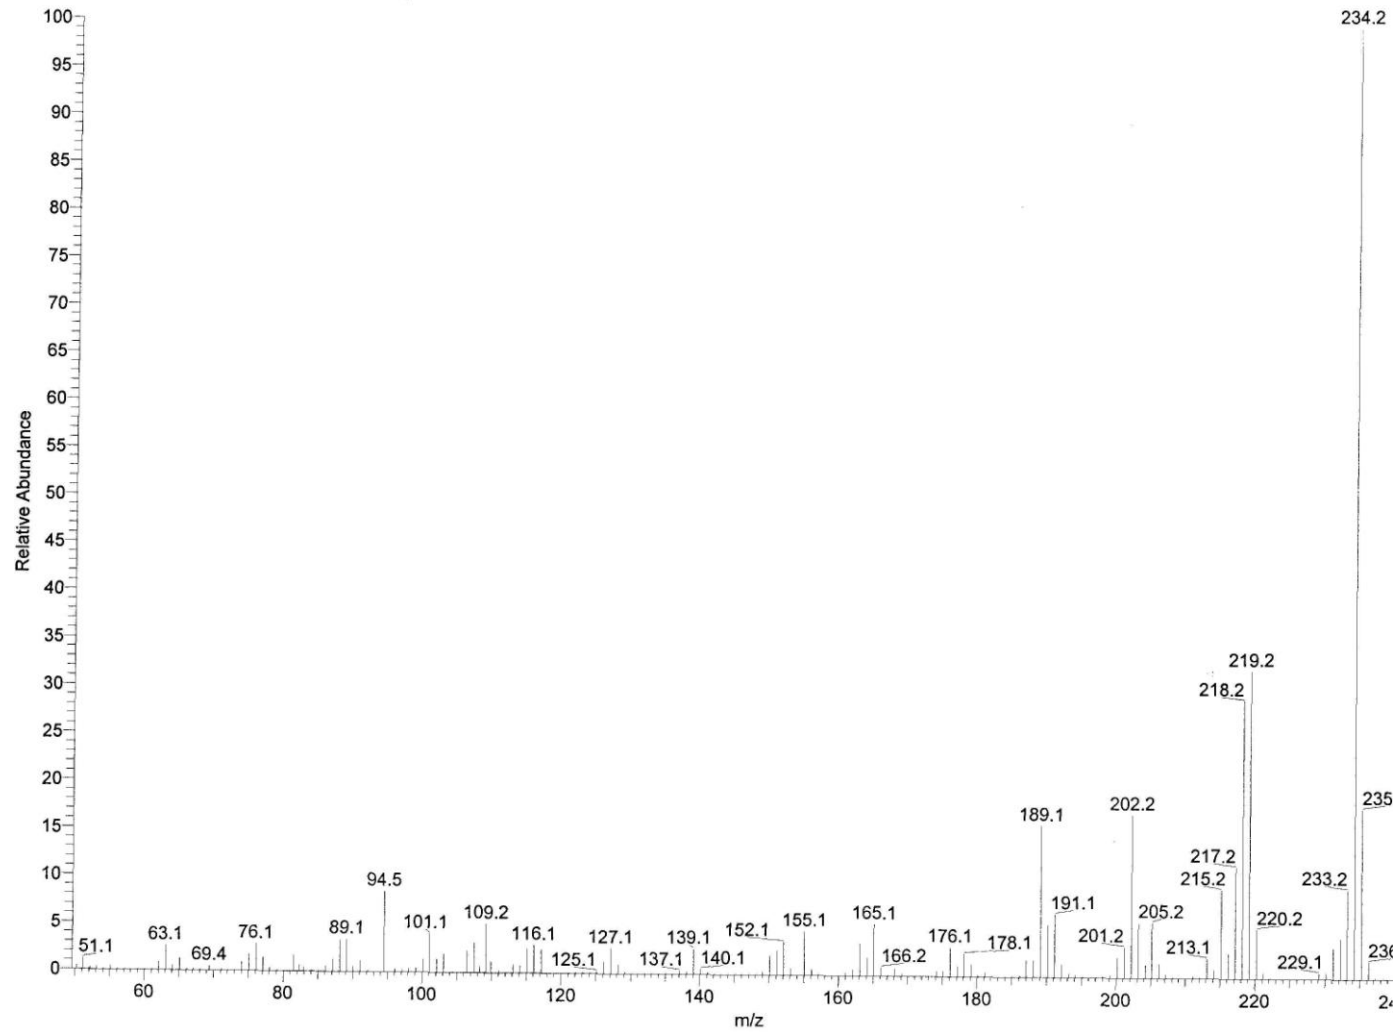

**Compound 5: 8-(4-methoxyphenyl)-1-naphthol**

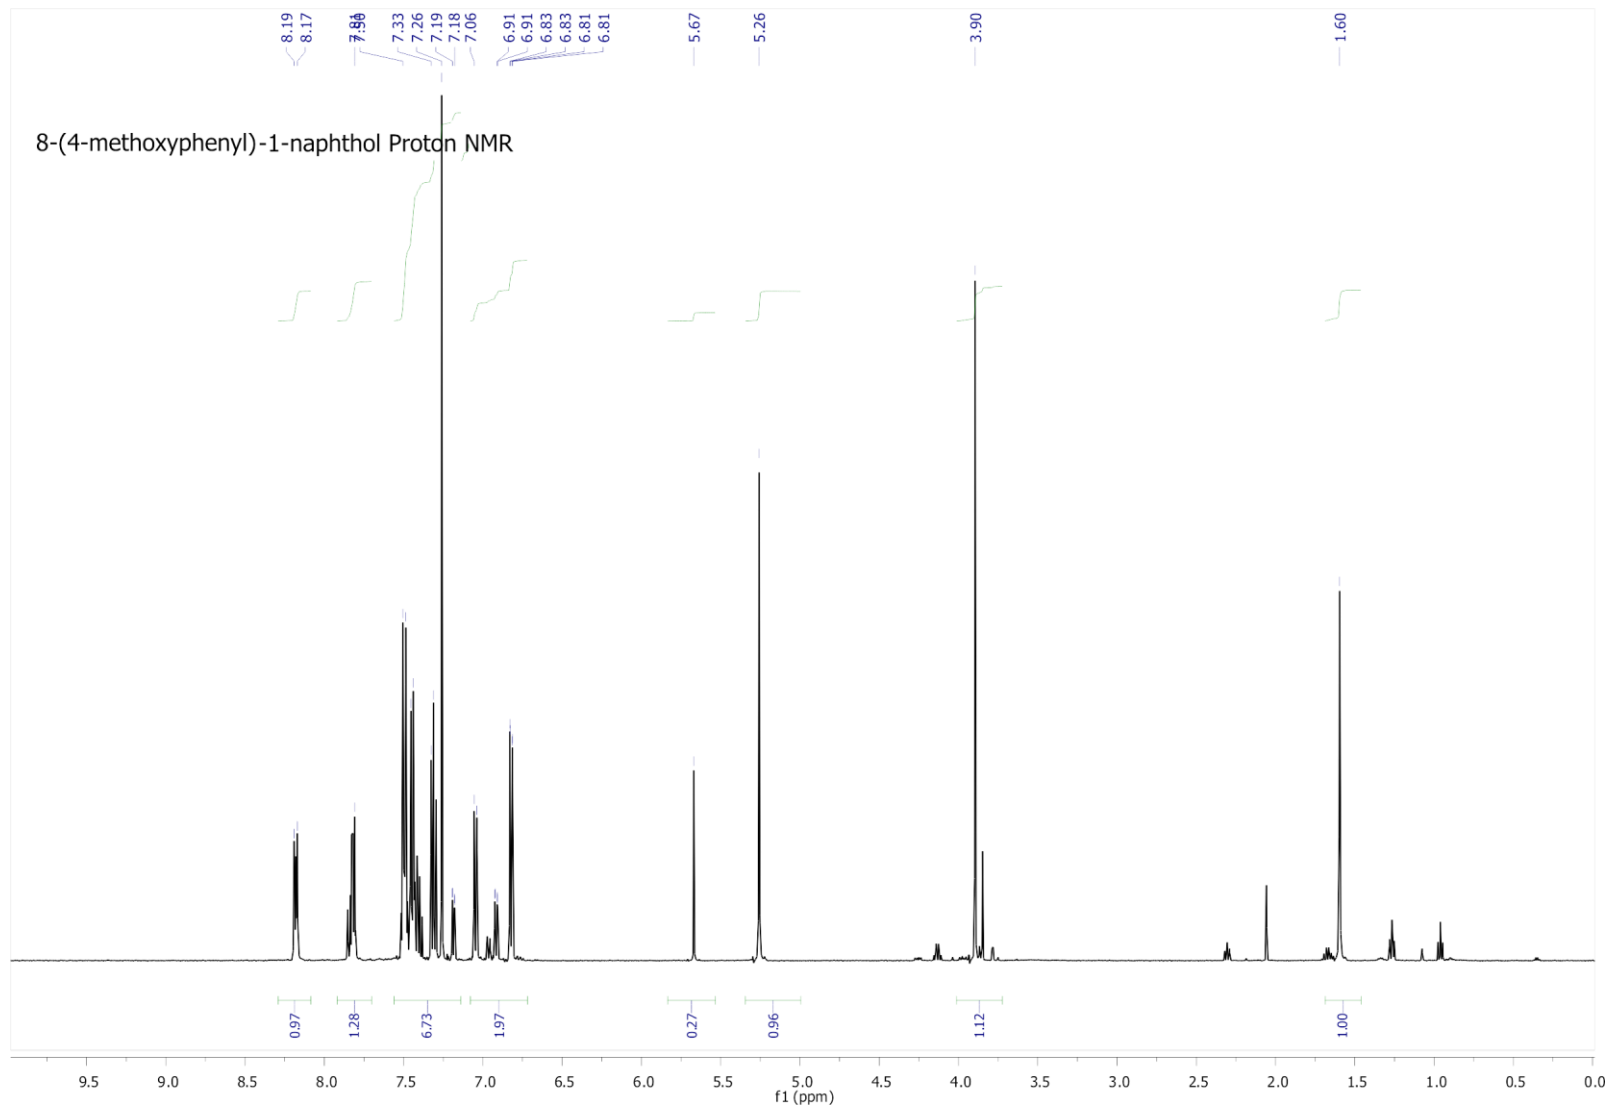



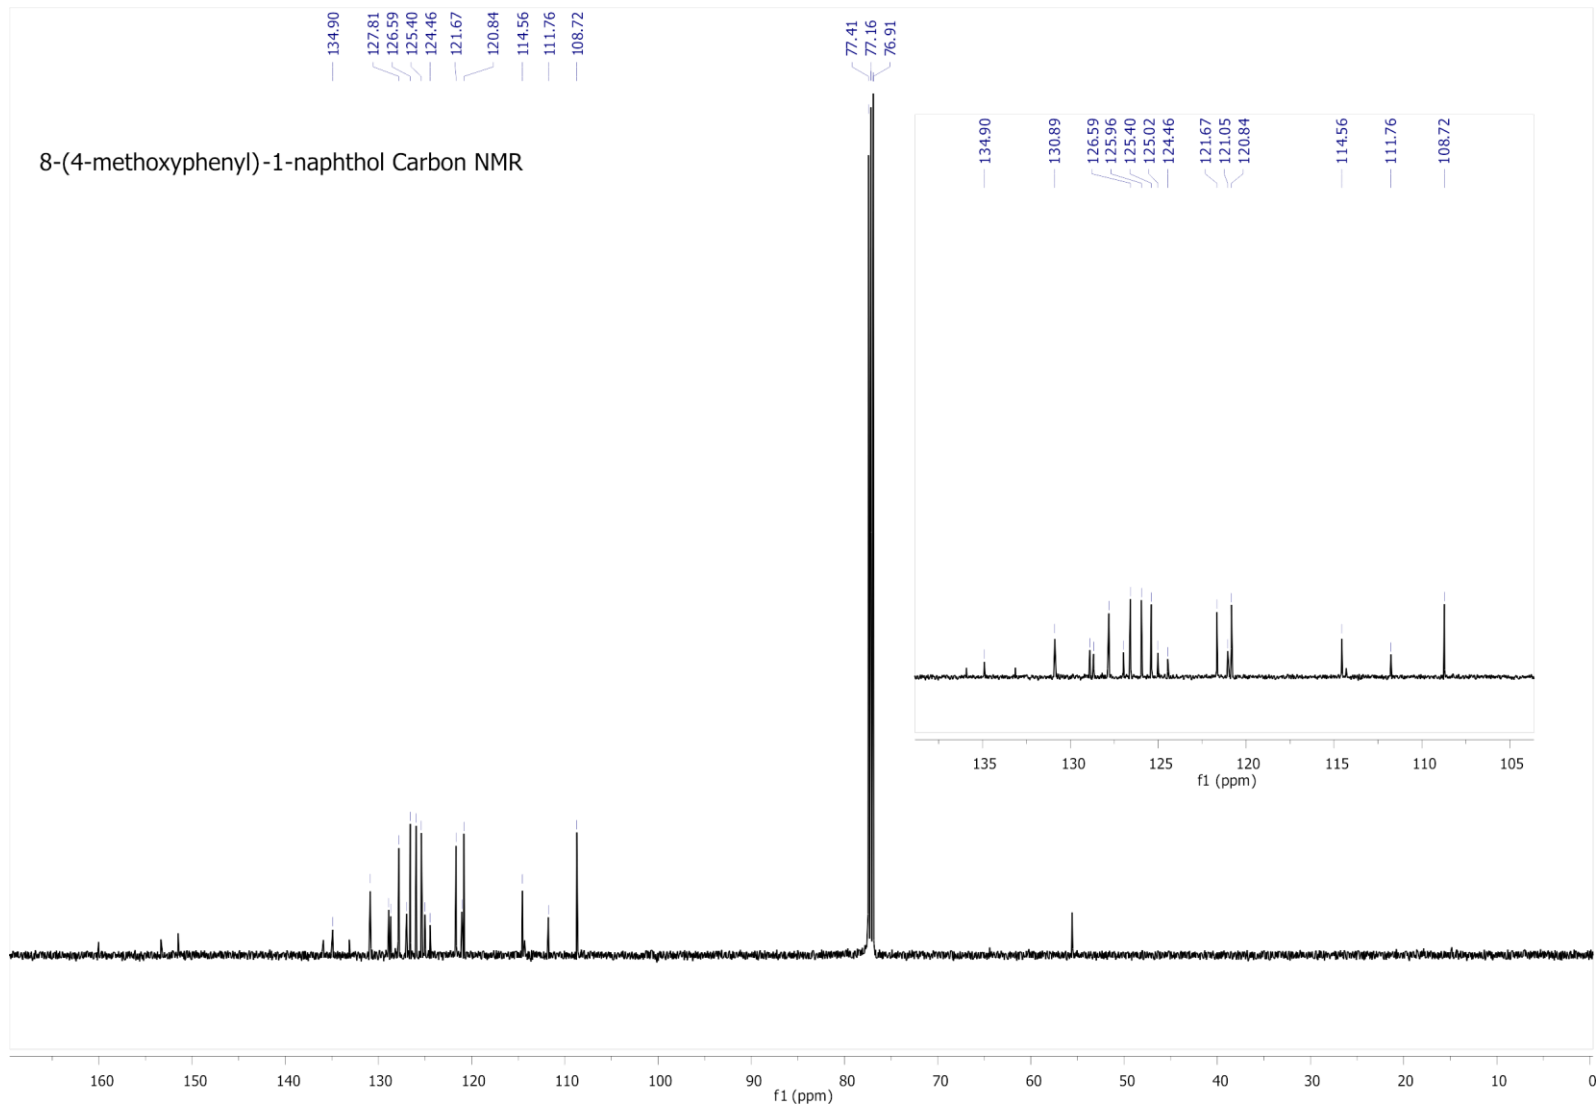

Analyst  
Date

Administrator  
26 January 2009 14:48

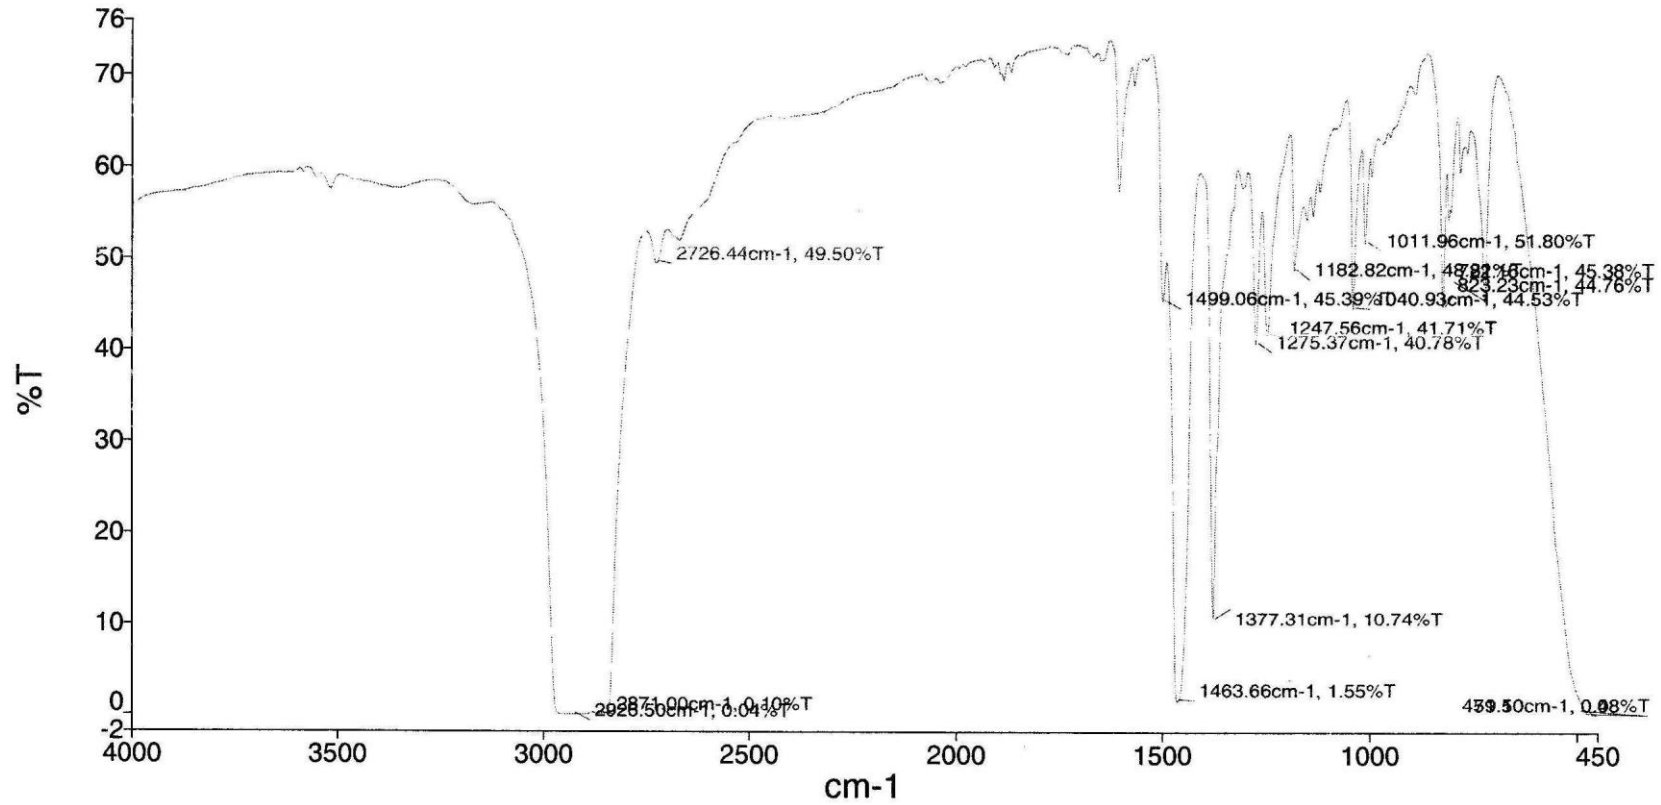

Administrator 11 Sample 011 By Administrator date Monday, January 26 2009

cad03 #1228-1230 RT: 23.47-23.50 AV: 3 SB: 11 23.25-23.42 NL: 1.47E4

T: {0,0} + c EI det=350.00 Full ms [ 50.00-650.00]

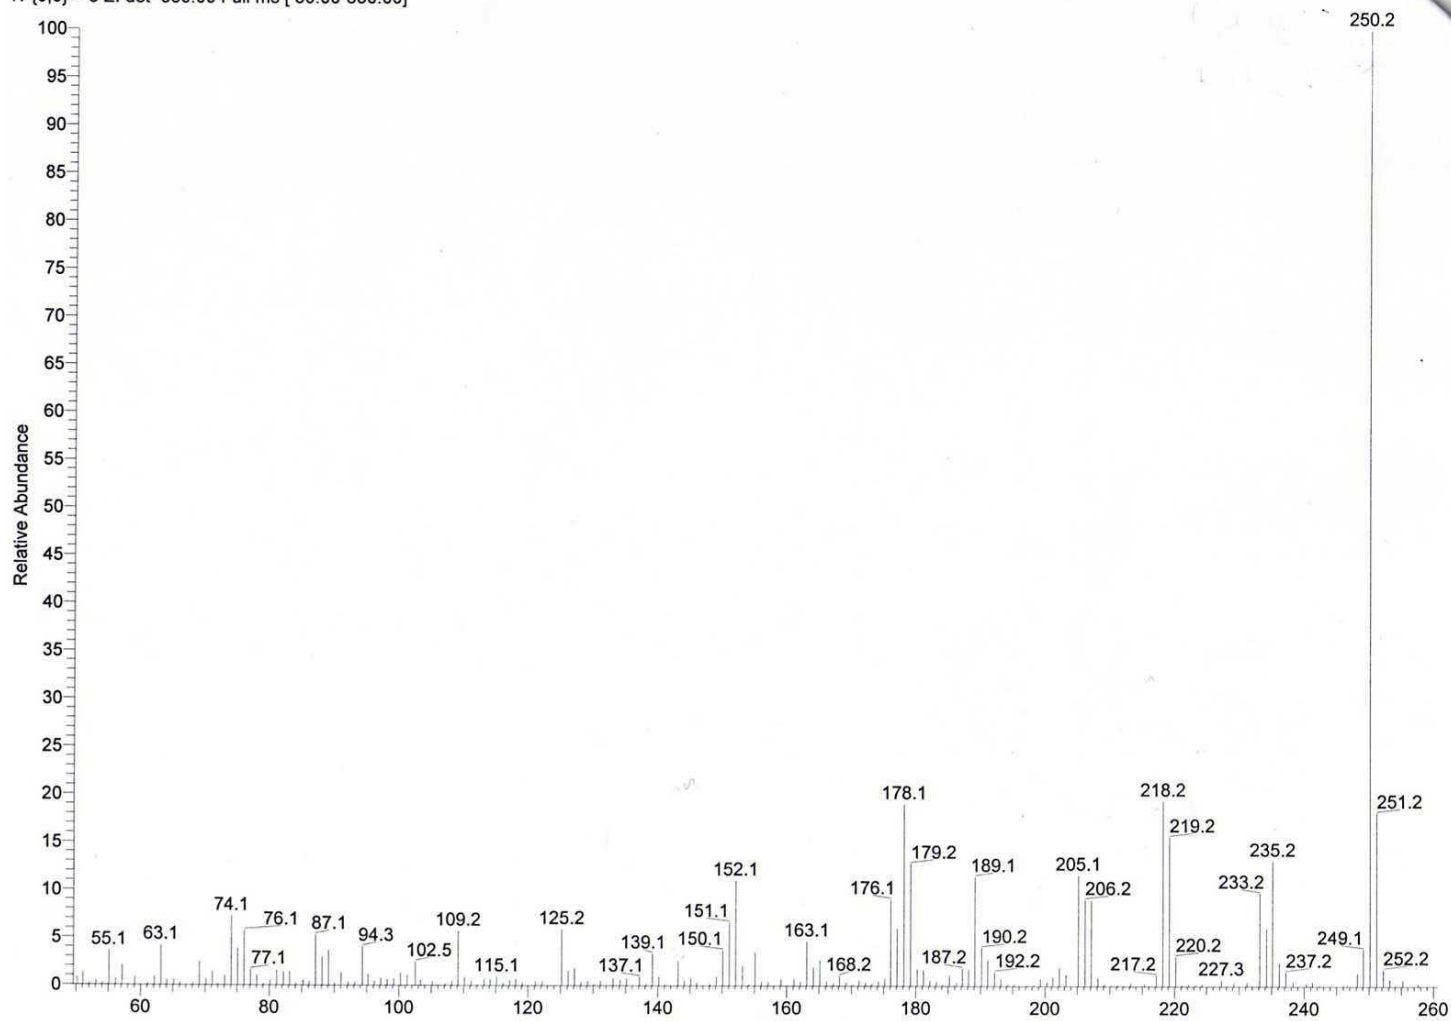

Supplement: Additional file 2 [file 1860-5397-7-42-S2.pdf]
