# Supplementary material for: Anion–π interactions influence pKa values
Source: publisher site journal article supplement (doi:10.3762/bjoc.7.42), 2011-03-17

# Supporting Information

for

## **Anion– $\pi$ interactions influence $pK_a$ values**

Christopher J. Cadman and Anna K. Croft\*

Address: School of Chemistry, University of Wales Bangor, Bangor, Gwynedd, LL57 2UW, United Kingdom. Fax: +44 1248 370 528. Tel: +44 1248 382 375.

Email: Anna K. Croft - [a.k.croft@bangor.ac.uk](mailto:a.k.croft@bangor.ac.uk)

\*Corresponding author

## **Molecular graphs for molecules 1(a)-5(a) and 8-12**

generated with AIM2000

**Naphthol derivatives:**

**1(a)**

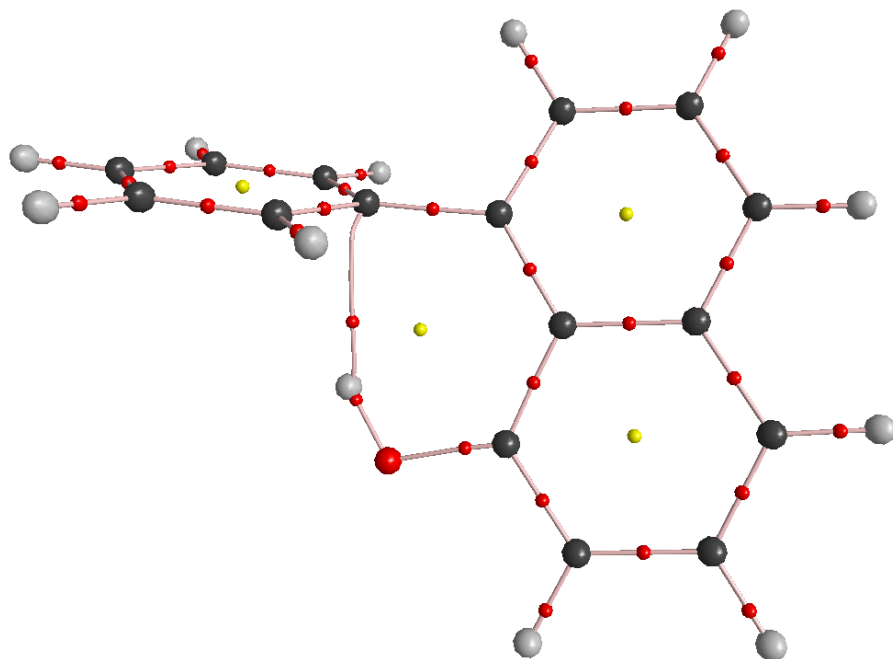

**2(a)**

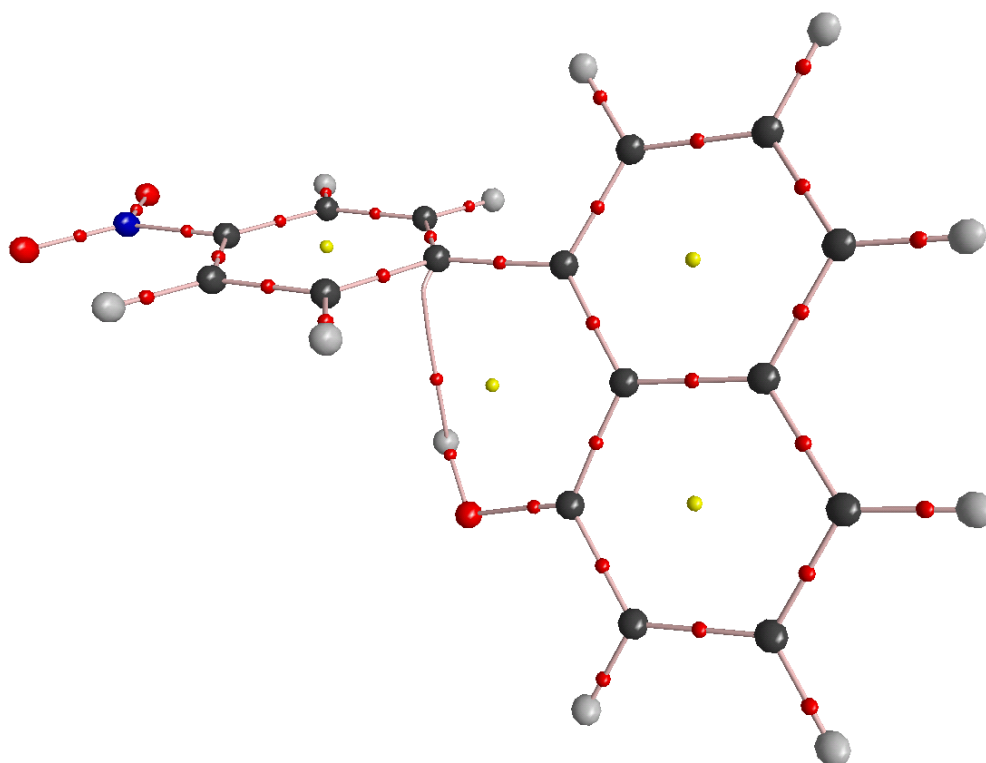

**3(a)**

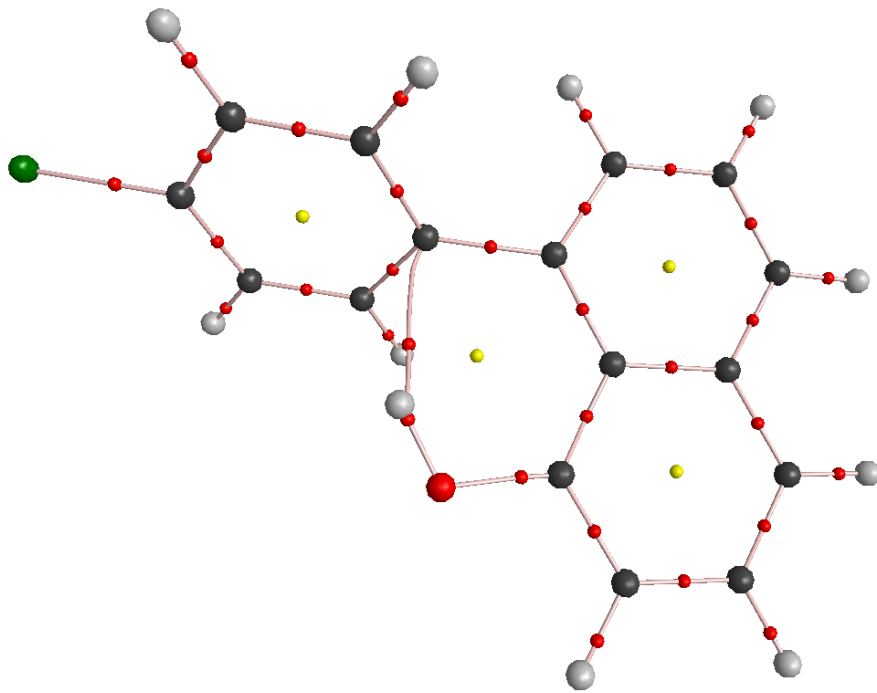

4(a)

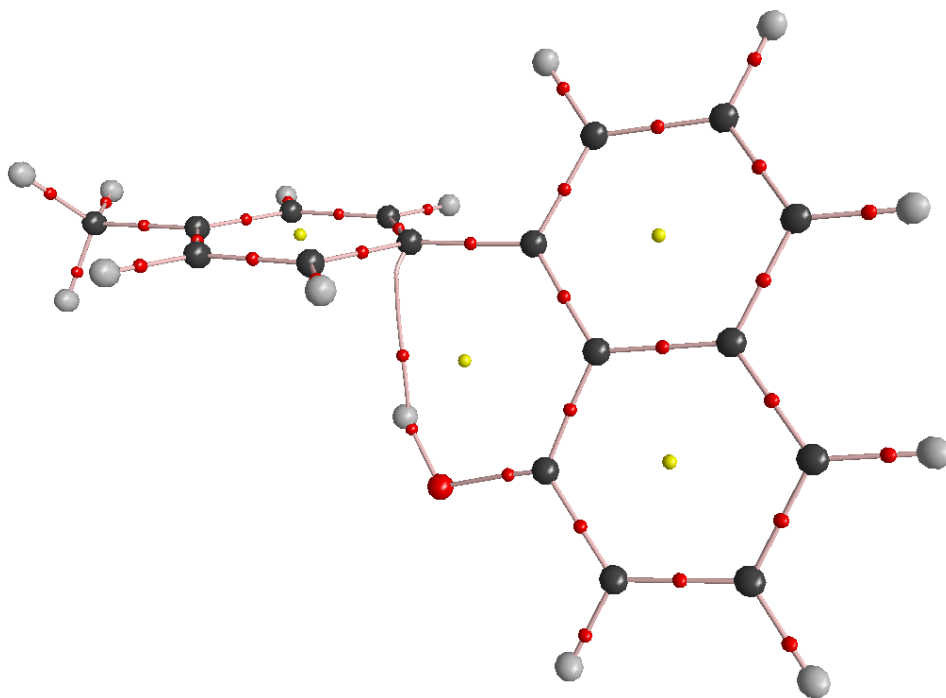

5(a)

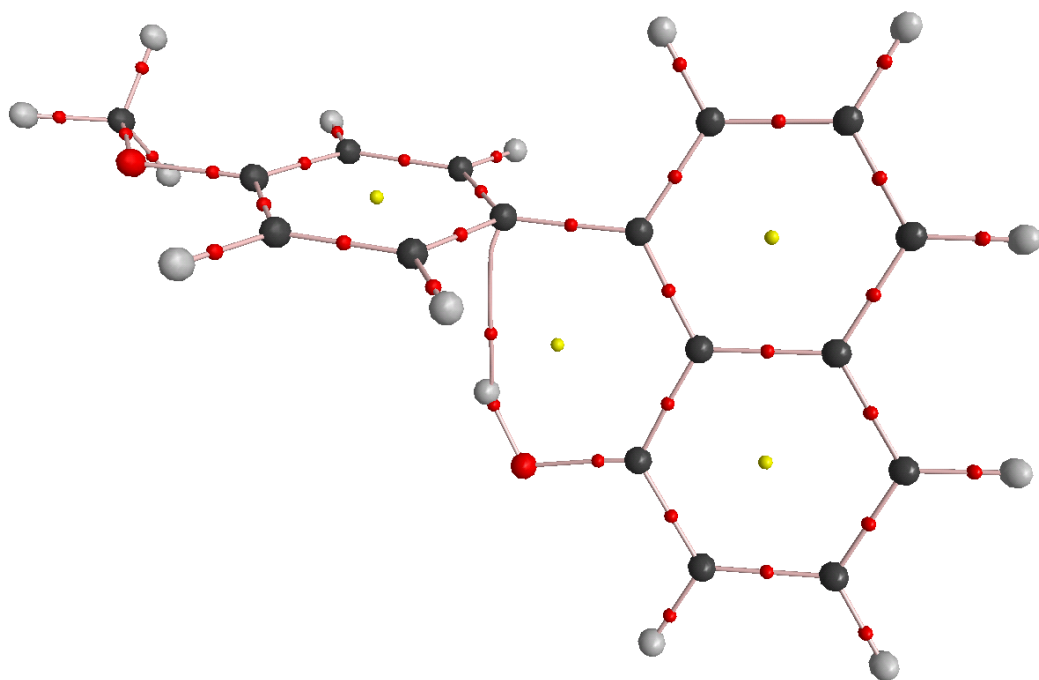

Anions:

8

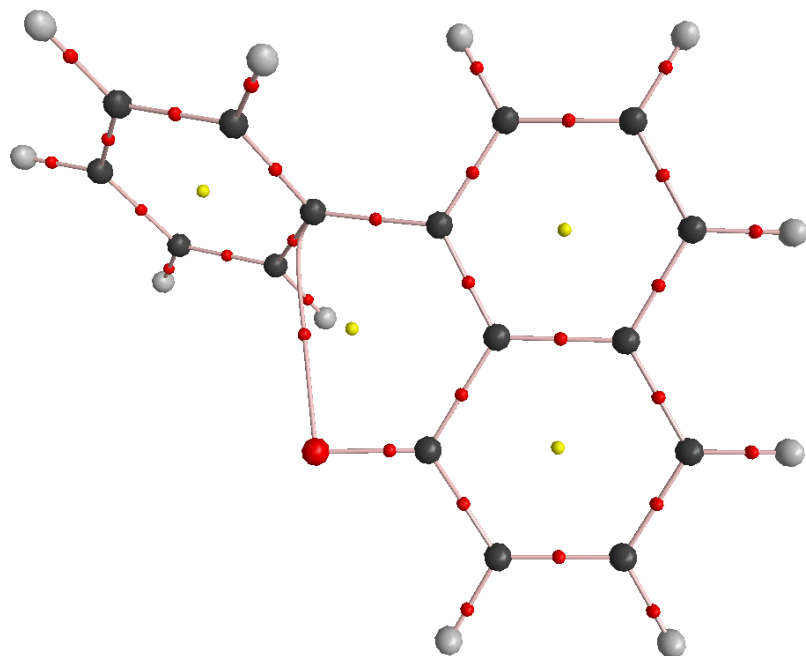

9

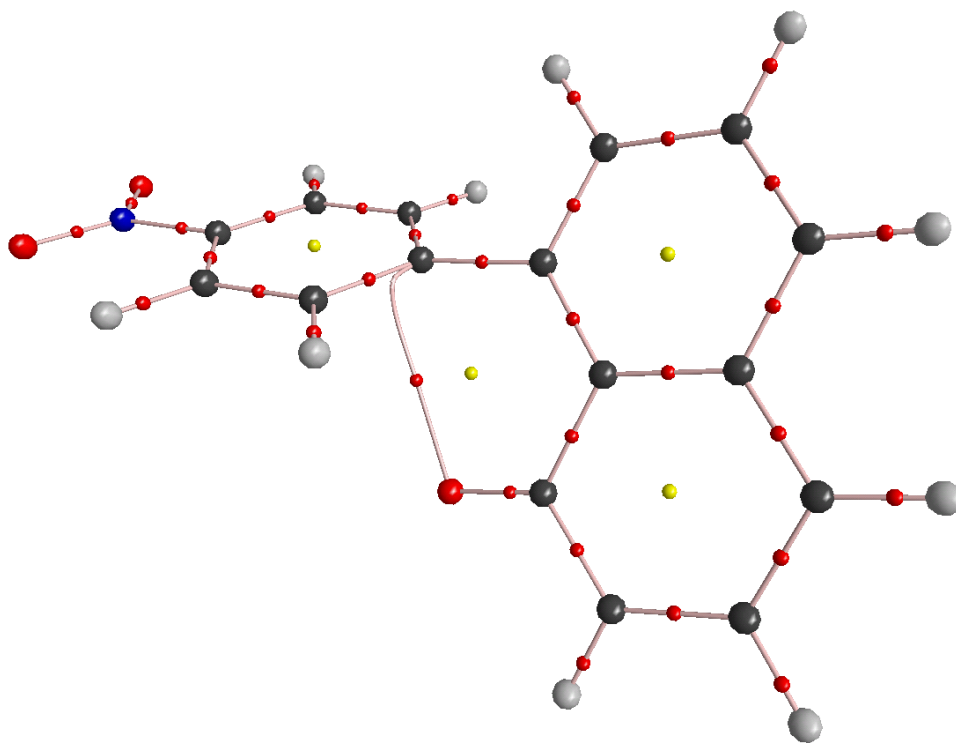

10

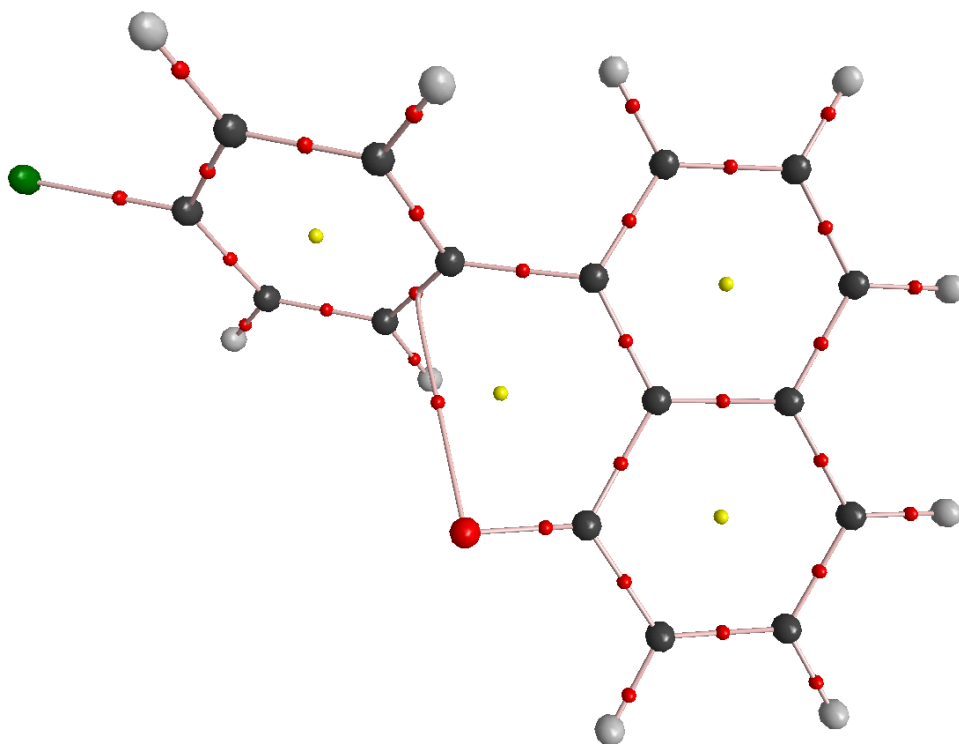

11

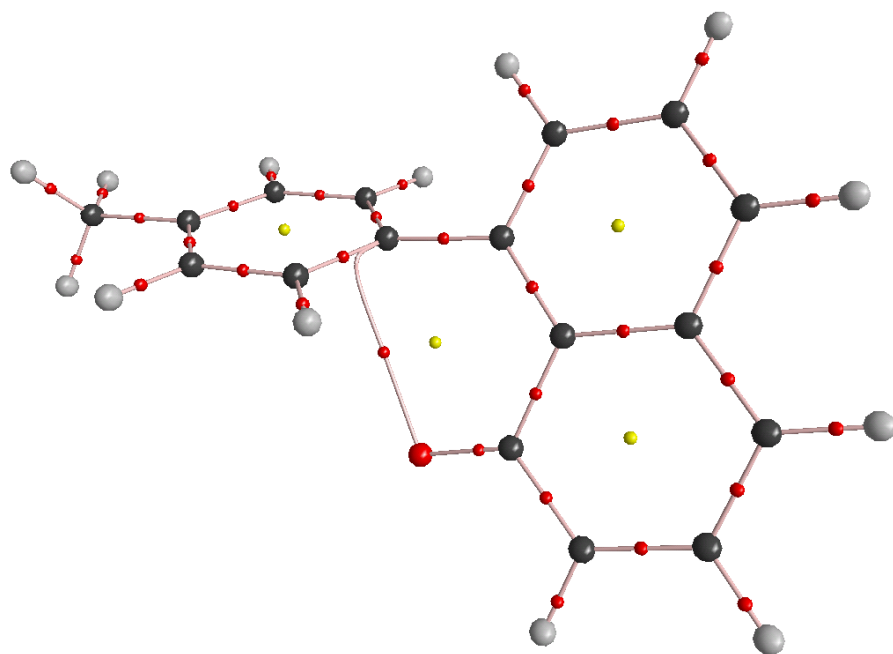

12

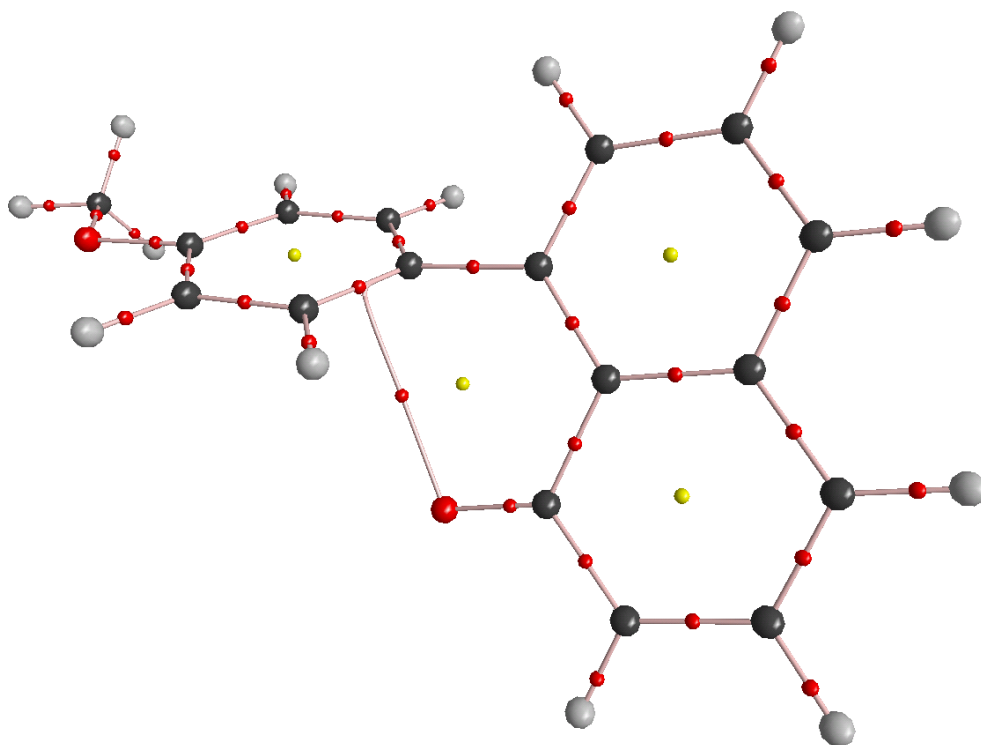

Supplement: Additional file 3 [file 1860-5397-7-42-S3.pdf]
