# Supplementary material for: Anion–π interactions influence pKa values
Source: publisher site journal article supplement (doi:10.3762/bjoc.7.42), 2011-03-17
Supplement: Additional file 6 [file 1860-5397-7-42-S6.pdf]

# Supporting Information

for

## **Anion– $\pi$ interactions influence $pK_a$ values**

Christopher J. Cadman and Anna K. Croft\*

Address: School of Chemistry, University of Wales Bangor, Bangor, Gwynedd, LL57 2UW,  
United Kingdom. Fax: +44 1248 370 528. Tel: +44 1248 382 375.

Email: Anna K. Croft - [a.k.croft@bangor.ac.uk](mailto:a.k.croft@bangor.ac.uk)

\*Corresponding author

## **Crystal structure refinement details for compound 4**

**Table 1:** Crystal data and structure refinement details.

|                                                                                        |                                                               |                           |
|----------------------------------------------------------------------------------------|---------------------------------------------------------------|---------------------------|
| Identification code                                                                    | <b>2009src0664</b>                                            |                           |
| Empirical formula                                                                      | C <sub>17</sub> H <sub>14</sub> O                             |                           |
| Formula weight                                                                         | 234.28                                                        |                           |
| Temperature                                                                            | 120(2) K                                                      |                           |
| Wavelength                                                                             | 0.71073 Å                                                     |                           |
| Crystal system                                                                         | Monoclinic                                                    |                           |
| Space group                                                                            | C2/c                                                          |                           |
| Unit cell dimensions                                                                   | <i>a</i> = <b>13.3991(5)</b> Å                                | $\alpha = 90^\circ$       |
|                                                                                        | <i>b</i> = <b>8.2341(3)</b> Å                                 | $\beta = 96.356(2)^\circ$ |
|                                                                                        | <i>c</i> = <b>22.8014(8)</b> Å                                | $\gamma = 90^\circ$       |
| Volume                                                                                 | 2500.20(16) Å <sup>3</sup>                                    |                           |
| Z                                                                                      | 8                                                             |                           |
| Density (calculated)                                                                   | 1.245 Mg / m <sup>3</sup>                                     |                           |
| Absorption coefficient                                                                 | 0.076 mm <sup>-1</sup>                                        |                           |
| <i>F</i> (000)                                                                         | 992                                                           |                           |
| Crystal                                                                                | Block; colourless                                             |                           |
| Crystal size                                                                           | 0.30 × 0.30 × 0.10 mm <sup>3</sup>                            |                           |
| $\theta$ range for data collection                                                     | 2.99 – 27.47°                                                 |                           |
| Index ranges                                                                           | -17 ≤ <i>h</i> ≤ 17, -10 ≤ <i>k</i> ≤ 10, -29 ≤ <i>l</i> ≤ 29 |                           |
| Reflections collected                                                                  | 17562                                                         |                           |
| Independent reflections                                                                | 2874 [ <i>R</i> <sub>int</sub> = 0.0602]                      |                           |
| Completeness to $\theta = 27.47^\circ$                                                 | 99.9 %                                                        |                           |
| Absorption correction                                                                  | Semi-empirical from equivalents                               |                           |
| Max. and min. transmission                                                             | 0.9925 and 0.9776                                             |                           |
| Refinement method                                                                      | Full-matrix least-squares on <i>F</i> <sup>2</sup>            |                           |
| Data / restraints / parameters                                                         | 2874 / 0 / 165                                                |                           |
| Goodness-of-fit on <i>F</i> <sup>2</sup>                                               | 1.046                                                         |                           |
| Final <i>R</i> indices [ <i>F</i> <sup>2</sup> > 2 $\sigma$ ( <i>F</i> <sup>2</sup> )] | <i>RI</i> = 0.0553, <i>wRI</i> = 0.1463                       |                           |
| <i>R</i> indices (all data)                                                            | <i>RI</i> = 0.0821, <i>wRI</i> = 0.1638                       |                           |
| Largest diff. peak and hole                                                            | 0.270 and -0.284 e Å <sup>-3</sup>                            |                           |

**Diffraction:** Nonius KappaCCD area detector ( $\phi$  scans and  $\omega$  scans to fill *asymmetric unit*). **Cell determination:** DirAx (Duisenberg, A.J.M.(1992). *J. Appl. Cryst.* 25, 92-96.) **Data collection:** Collect (Collect: Data collection software, R. Hoof, Nonius B.V., 1998). **Data reduction and cell refinement:** Denzo (Z. Otwinowski & W. Minor, *Methods in Enzymology* (1997) Vol. 276: *Macromolecular Crystallography*, part A, pp. 307-326; C. W. Carter, Jr. & R. M. Sweet, Eds., Academic Press). **Absorption correction:** Sheldrick, G. M. SADABS - Bruker Nonius area detector scaling and absorption correction - V2.10 **Structure solution:** SHELXS97 (G. M. Sheldrick, *Acta Cryst.* (1990) A46 467-473). **Structure refinement:** SHELXL97 (G. M. Sheldrick (1997), University of Göttingen, Germany). **Graphics:** Cameron - A Molecular Graphics Package. (D. M. Watkin, L. Pearce and C. K. Prout, Chemical Crystallography Laboratory, University of Oxford, 1993).

**Special details:**

**Table 2:** Atomic coordinates [ $\times 10^4$ ], equivalent isotropic displacement parameters [ $\text{\AA}^2 \times 10^3$ ] and site occupancy factors.  $U_{eq}$  is defined as one third of the trace of the orthogonalized  $U^{ij}$  tensor.

| Atom | $x$     | $y$      | $z$     | $U_{eq}$ | $S.o.f.$ |
|------|---------|----------|---------|----------|----------|
| C1   | 6312(1) | 3436(2)  | 6611(1) | 25(1)    | 1        |
| C2   | 5913(1) | 4631(2)  | 6933(1) | 30(1)    | 1        |
| C3   | 6520(1) | 5838(2)  | 7221(1) | 33(1)    | 1        |
| C4   | 7528(1) | 5845(2)  | 7183(1) | 32(1)    | 1        |
| C5   | 9022(1) | 4677(2)  | 6810(1) | 30(1)    | 1        |
| C6   | 9469(1) | 3510(2)  | 6507(1) | 31(1)    | 1        |
| C7   | 8881(1) | 2258(2)  | 6219(1) | 28(1)    | 1        |
| C8   | 7857(1) | 2191(2)  | 6228(1) | 23(1)    | 1        |
| C9   | 7371(1) | 3397(2)  | 6547(1) | 22(1)    | 1        |
| C10  | 7969(1) | 4651(2)  | 6846(1) | 26(1)    | 1        |
| C11  | 7318(1) | 805(2)   | 5907(1) | 24(1)    | 1        |
| C12  | 7393(1) | -760(2)  | 6144(1) | 28(1)    | 1        |
| C13  | 6936(1) | -2067(2) | 5841(1) | 29(1)    | 1        |
| C14  | 6391(1) | -1873(2) | 5288(1) | 27(1)    | 1        |
| C15  | 6319(1) | -315(2)  | 5048(1) | 29(1)    | 1        |
| C16  | 6772(1) | 998(2)   | 5351(1) | 28(1)    | 1        |
| C17  | 5891(1) | -3307(2) | 4971(1) | 36(1)    | 1        |
| O1   | 5648(1) | 2296(2)  | 6376(1) | 35(1)    | 1        |

**Table 3:** Bond lengths [ $\text{\AA}$ ] and angles [ $^\circ$ ].

|           |            |               |            |
|-----------|------------|---------------|------------|
| C1–O1     | 1.362(2)   | C10–C4–H4     | 119.8      |
| C1–C2     | 1.371(2)   | C6–C5–C10     | 120.92(16) |
| C1–C9     | 1.443(2)   | C6–C5–H5      | 119.5      |
| C2–C3     | 1.400(3)   | C10–C5–H5     | 119.5      |
| C2–H2     | 0.9500     | C5–C6–C7      | 119.77(16) |
| C3–C4     | 1.364(3)   | C5–C6–H6      | 120.1      |
| C3–H3     | 0.9500     | C7–C6–H6      | 120.1      |
| C4–C10    | 1.415(2)   | C8–C7–C6      | 121.87(16) |
| C4–H4     | 0.9500     | C8–C7–H7      | 119.1      |
| C5–C6     | 1.361(3)   | C6–C7–H7      | 119.1      |
| C5–C10    | 1.423(2)   | C7–C8–C9      | 119.41(15) |
| C5–H5     | 0.9500     | C7–C8–C11     | 116.79(14) |
| C6–C7     | 1.414(2)   | C9–C8–C11     | 123.79(14) |
| C6–H6     | 0.9500     | C8–C9–C10     | 118.75(14) |
| C7–C8     | 1.376(2)   | C8–C9–C1      | 125.15(15) |
| C7–H7     | 0.9500     | C10–C9–C1     | 116.07(14) |
| C8–C9     | 1.429(2)   | C4–C10–C5     | 119.79(16) |
| C8–C11    | 1.498(2)   | C4–C10–C9     | 120.95(15) |
| C9–C10    | 1.432(2)   | C5–C10–C9     | 119.26(15) |
| C11–C12   | 1.396(2)   | C12–C11–C16   | 117.60(15) |
| C11–C16   | 1.402(2)   | C12–C11–C8    | 120.24(14) |
| C12–C13   | 1.385(2)   | C16–C11–C8    | 122.07(14) |
| C12–H12   | 0.9500     | C13–C12–C11   | 120.98(15) |
| C13–C14   | 1.396(2)   | C13–C12–H12   | 119.5      |
| C13–H13   | 0.9500     | C11–C12–H12   | 119.5      |
| C14–C15   | 1.393(2)   | C12–C13–C14   | 121.34(15) |
| C14–C17   | 1.503(2)   | C12–C13–H13   | 119.3      |
| C15–C16   | 1.386(2)   | C14–C13–H13   | 119.3      |
| C15–H15   | 0.9500     | C15–C14–C13   | 117.88(15) |
| C16–H16   | 0.9500     | C15–C14–C17   | 121.80(16) |
| C17–H17A  | 0.9800     | C13–C14–C17   | 120.32(16) |
| C17–H17B  | 0.9800     | C16–C15–C14   | 120.96(15) |
| C17–H17C  | 0.9800     | C16–C15–H15   | 119.5      |
| O1–H1     | 0.8400     | C14–C15–H15   | 119.5      |
|           |            | C15–C16–C11   | 121.23(16) |
| O1–C1–C2  | 115.46(15) | C15–C16–H16   | 119.4      |
| O1–C1–C9  | 123.42(14) | C11–C16–H16   | 119.4      |
| C2–C1–C9  | 121.10(16) | C14–C17–H17A  | 109.5      |
| C1–C2–C3  | 121.31(16) | C14–C17–H17B  | 109.5      |
| C1–C2–H2  | 119.3      | H17A–C17–H17B | 109.5      |
| C3–C2–H2  | 119.3      | C14–C17–H17C  | 109.5      |
| C4–C3–C2  | 120.06(16) | H17A–C17–H17C | 109.5      |
| C4–C3–H3  | 120.0      | H17B–C17–H17C | 109.5      |
| C2–C3–H3  | 120.0      | C1–O1–H1      | 109.5      |
| C3–C4–C10 | 120.49(16) |               |            |
| C3–C4–H4  | 119.8      |               |            |

Symmetry transformations used to generate equivalent atoms:

**Table 4:** Anisotropic displacement parameters [ $\text{\AA}^2 \times 10^3$ ]. The anisotropic displacement factor exponent takes the form:  $-2\pi^2[h^2 a^{*2} U^{11} + \dots + 2 h k a^* b^* U^{12}]$ .

| Atom | $U^{11}$ | $U^{22}$ | $U^{33}$ | $U^{23}$ | $U^{13}$ | $U^{12}$ |
|------|----------|----------|----------|----------|----------|----------|
| C1   | 29(1)    | 25(1)    | 22(1)    | 4(1)     | 4(1)     | 0(1)     |
| C2   | 34(1)    | 33(1)    | 25(1)    | 4(1)     | 9(1)     | 7(1)     |
| C3   | 46(1)    | 30(1)    | 24(1)    | -2(1)    | 8(1)     | 7(1)     |
| C4   | 46(1)    | 27(1)    | 23(1)    | -2(1)    | 2(1)     | -2(1)    |
| C5   | 33(1)    | 30(1)    | 27(1)    | 4(1)     | 0(1)     | -9(1)    |
| C6   | 23(1)    | 40(1)    | 31(1)    | 6(1)     | 3(1)     | -5(1)    |
| C7   | 26(1)    | 30(1)    | 30(1)    | 4(1)     | 7(1)     | 3(1)     |
| C8   | 26(1)    | 22(1)    | 22(1)    | 3(1)     | 4(1)     | 0(1)     |
| C9   | 27(1)    | 19(1)    | 19(1)    | 3(1)     | 3(1)     | 0(1)     |
| C10  | 34(1)    | 23(1)    | 19(1)    | 4(1)     | 1(1)     | -3(1)    |
| C11  | 25(1)    | 23(1)    | 24(1)    | -1(1)    | 6(1)     | 1(1)     |
| C12  | 36(1)    | 26(1)    | 23(1)    | 2(1)     | 3(1)     | -1(1)    |
| C13  | 37(1)    | 21(1)    | 29(1)    | 0(1)     | 7(1)     | 0(1)     |
| C14  | 25(1)    | 27(1)    | 29(1)    | -6(1)    | 9(1)     | -1(1)    |
| C15  | 28(1)    | 34(1)    | 25(1)    | -1(1)    | 2(1)     | -1(1)    |
| C16  | 31(1)    | 25(1)    | 27(1)    | 4(1)     | 4(1)     | 3(1)     |
| C17  | 36(1)    | 33(1)    | 40(1)    | -10(1)   | 7(1)     | -8(1)    |
| O1   | 27(1)    | 36(1)    | 43(1)    | -9(1)    | 10(1)    | -4(1)    |

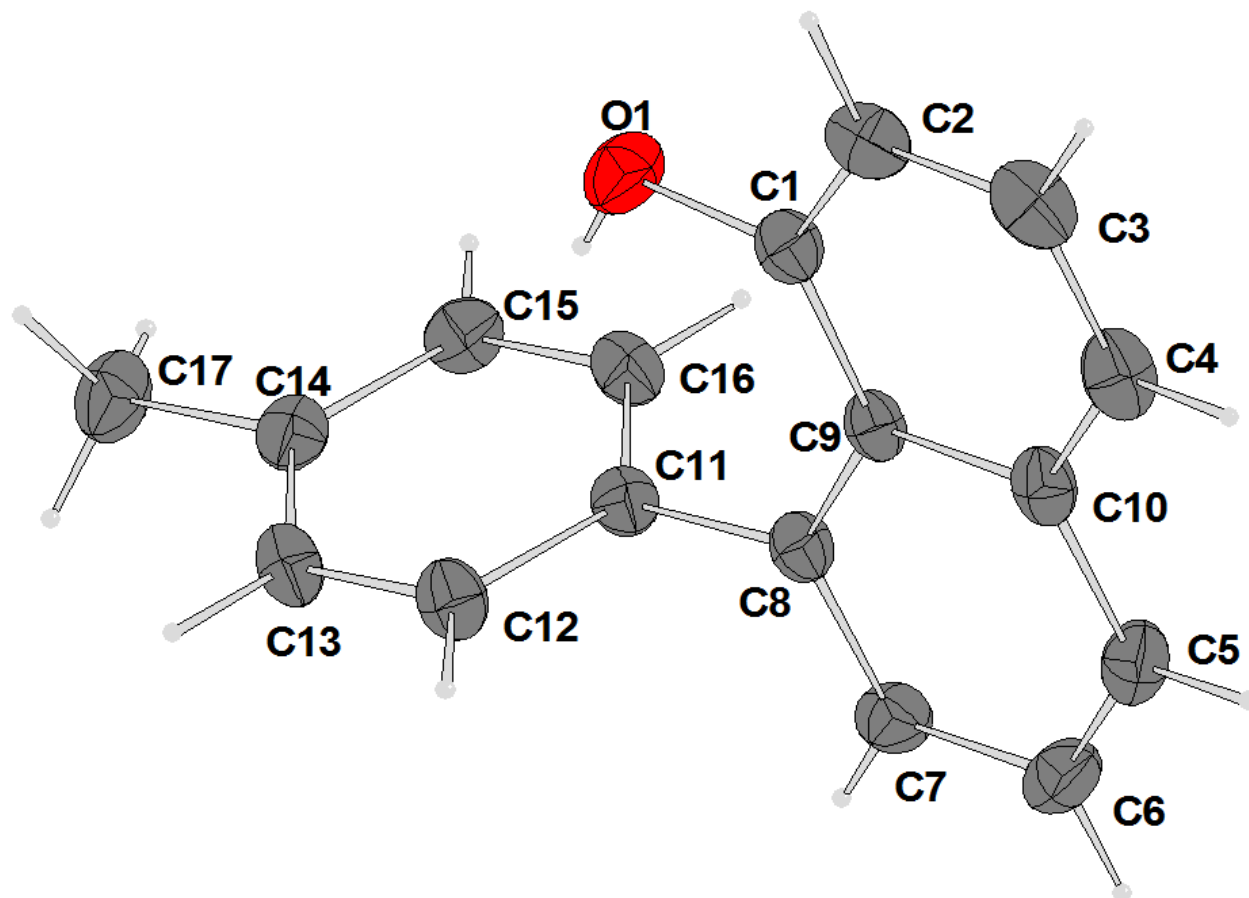

Thermal ellipsoids drawn at the 50% probability level.
